# Supplementary material for: Systematic Reviews of Machine Learning in Healthcare: A Literature Review
Source: Research Square preprint supplement (doi:10.21203/rs.3.rs-3035548/v1), 2023-06-16
Supplement: Supplementary file 1 [file 8095e6a63b6af7f5e59304ba.docx]

**Appendix**

**Appendix 1.** Maximum and minimum accuracy, sensitivity, specificity in included reviews conducted in certain ICD chapters.

| **ICD-10 Chapter** | **Block** | **Name of ICD-10 chapter** | **Max. accuracy** | | **Min. accuracy** | | **Max. sensitivity** | | **Min. sensitivity** | | **Max. specificity** | | **Min. specificity** | |
| --- | --- | --- | --- | --- | --- | --- | --- | --- | --- | --- | --- | --- | --- | --- |
| **Value** | **Ref.** | **Value** | **Ref.** | **Value** | **Ref.** | **Value** | **Ref.** | **Value** | **Ref.** | **Value** | **Ref.** |
| I | A00–B99 | Certain infectious and parasitic diseases | 75% | (80) | 60% | (44) | 67% | (44) | 67% | (44) | 40% | (44) | 40% | (44) |
| II | C00–D48 | Neoplasms | 100% | (16, 35, 136, 197) | 0% | (41) | 100% | (19, 35, 41, 136) | 0% | (40, 158) | 100% | (19, 35, 99) | 0% | (40, 41, 158) |
| III | D50–D89 | Diseases of the blood and blood-forming organs and certain disorders involving the immune mechanism | 38% | (60) | 38% | (60) | 0% | (60) | 0% | (60) | 0% | (60) | 0% | (60) |
| IV | E00–E90 | Endocrine, nutritional and metabolic diseases | 100% | (226) | 13% | (226) | 46% | (63) | 38% | (222) | 34% | (63) | 28% | (222) |
| V | F00–F99 | Mental and behavioural disorders | 100% | (51) | 5% | (132) | 66% | (163) | 0% | (132) | 66% | (163) | 0% | (132) |
| VI | G00–G99 | Diseases of the nervous system | 100% | (69, 128) | 42% | (26) | 100% | (69) | 0% | (68) | 100% | (69) | 0% | (68) |
| VII | H00–H59 | Diseases of the eye and adnexa | 100% | (133) | 31% | (133) | 76% | (133) | 76% | (133) | 59% | (133) | 59% | (133) |
| VIII | H60–H95 | Diseases of the ear and mastoid process | 91% | (6) | 91% | (6) | NA | NA | NA | NA | NA | NA | NA | NA |
| IX | I00–I99 | Diseases of the circulatory system | 95% | (85) | 23% | (142) | 92% | (11) | 92% | (142) | 17% | (11) | 25% | (22) |
| X | J00–J99 | Diseases of the respiratory system | 100% | (137, 138) | 2% | (39) | 78% | (134) | 0% | (13) | 75% | (134) | 0% | (13) |
| XI | K00–K93 | Diseases of the digestive system | 100% | (19, 52, 150) | 50% | (18) | 100% | (19, 52, 53, 150, 162) | 100% | (19, 52, 53, 150, 162) | 100% | (19, 52, 53, 150, 162) | 100% | (19, 52, 53, 150, 162) |
| XII | L00–L99 | Diseases of the skin and subcutaneous tissue | 89% | 89 | 42% | 217 | 9% | 217 | 9% | 217 | 6% | 184 | 6% | 217 |
| XIII | M00–M99 | Diseases of the musculoskeletal system and connective tissue | 100% | 152, 168 | 0% | 168 | 33% | 57 | 1% | 48 | 33% | 57 | 0% | 48 |
| XIV | N00–N99 | Diseases of the genitourinary system | 100% | 174 | 61% | 174 | NA | NA | NA | NA | NA | NA | NA | NA |
| XV | O00–O99 | Pregnancy, childbirth and the puerperium | 88% | 157 | 3% | 160 | 28% | 160 | 13% | 160 | 28% | 160 | 20% | 157 |
| XVIII | R00–R99 | Symptoms, signs and abnormal clinical and laboratory findings, not elsewhere classified | 27% | 42 | 27% | 42 | 27% | 42 | 27% | 42 | 27% | 42 | 27% | 42 |
| XIX | S00–T98 | Injury, poisoning and certain other consequences of external causes | 98% | 141 | 11% | 126 | 85% | 61 | 9% | 141 | 74% | 61 | 7% | 141 |
| XXI | Z00–Z99 | Factors influencing health status and contact with health services | 100% | 66, 135 | 15% | 113 | 99% | 95 | 10% | 192 | 100% | 95 | 6% | 135 |

**Appendix 2.** Types of validation discussed in included papers.

| **N** | **ICD-10 chapter** | **Lead author & year** | **Number studies included** | **Cross-validation** | **Boostrap sampling** | **Leave-one-out cross-validation** | **Comparison with clinical experts*** |
| --- | --- | --- | --- | --- | --- | --- | --- |
| 1 | X | Adamidi E 2021 (7) | 101 | 42 | NA | NA | NA |
| 2 | II | Adeoye J 2021 (8) | 27 | 6 | 3 | 1 | 2 |
| 3 | II | Akazawa M 2021 (10) | 71 | NA | NA | NA | NA |
| 4 | IX | Al Hinai G 2021 (11) | 12 | 7 | 0 | 0 | 2 |
| 5 | II | Alabi R 2021 (12) | 41 | NA | NA | NA | NA |
| 6 | XI | Anteby R 2021 (18) | 16 | 7 | NA | NA | NA |
| 7 | XI | Bang CS 2021a (19) | 33 | NA | NA | NA | NA |
| 8 | II | Bang CS 2021b (20) | 19 | NA | NA | NA | NA |
| 9 | II | Bedrikovetski S 2021b (24) | 21 | 0 | 0 | 3 | 0 |
| 10 | IX | Boyd C 2021 (30) | 47 | 13 | NA | 3 | 0 |
| 11 | X | Bracher-Smith M 2021 (31) | 13 | 8 | NA | NA | NA |
| 12 | VI | Buchlak Q 2020 (32) | 70 | NA | NA | NA | NA |
| 13 | VII | Buisson M 2021 (33) | 6 | 2 | NA | NA | 6 |
| 14 | II | Castaldo R 2021 (35) | 29 | 11 | 3 | NA | NA |
| 15 | X | Chee M 2021 (39) | 14 | 4 | NA | NA | NA |
| 16 | I | da Silva Neto S 2022 (44) | 15 | 7 | 0 | 1 | 0 |
| 17 | V | de Bardeci M 2021 (51) | 30 | NA | NA | NA | NA |
| 18 | XI | Decharatanachart P 2021a (52) | 19 | 4 | NA | 2 | NA |
| 19 | XI | Decharatanachart P 2021b (53) | 25 | 4 | NA | 2 | NA |
| 20 | XIII | DelSole E 2021 (54) | 44 | 2 | 1 | NA | NA |
| 21 | IX | Dudchenko A 2020 (56) | 27 | NA | NA | NA | NA |
| 22 | XIII | Ebrahimi A 2021 (57) | 12 | 5 | NA | NA | NA |
| 23 | III | Falconer N 2021 (60) | 8 | 3 | 0 | 1 | 0 |
| 24 | XIX | Farook T 2021 (61) | 34 | NA | NA | NA | NA |
| 25 | IV | Fregoso-Aparicio L 2021 (62) | 90 | 50 | 1 | 0 | 0 |
| 26 | VI | Grueso S 2021 (68) | 116 | 72 | NA | 13 | NA |
| 27 | VI | Gutiérrez-Tobal G 2021 (69) | 19 | 5 | 6 | 4 | NA |
| 28 | II | Haggenmuller S 2021 (70) | 19 | 2 | NA | NA | 19 |
| 29 | XIV | Hameed B 2021 (71) | 58 | 1 | NA | NA | NA |
| 30 | XXI | Hasan N 2021 (72) | 51 | 1 | NA | NA | NA |
| 31 | I | Hassan N 2021 (73) | 17 | 7 | 2 | 1 | 0 |
| 32 | XXI | Henn J 2021 (74) | 47 | 27 | NA | NA | 2 |
| 33 | XXI | Hickman S 2021 (75) | 14 | 1 | NA | NA | 12 |
| 34 | II | Hosni M 2019 (79) | 193 | 131 | NA | 16 | NA |
| 35 | XXI | Huang J 2021 (81) | 35 | 20 | NA | NA | NA |
| 36 | VI | Huang Z 2021 (83) | 28 | NA | NA | NA | NA |
| 37 | VI | Ibrahim B 2021 (84) | 36 | 3 | NA | 2 | NA |
| 38 | XII | Jiang M 2021 (89) | 32 | 1 | NA | NA | NA |
| 39 | II | Jones O 2020 (90) | 16 | 6 | 1 | 1 | 1 |
| 40 | IX | Karwath A 2021 (93) |  | NA | NA | NA | NA |
| 41 | XII | Kassem M 2021 (94) | 49 | 4 | 1 | NA | 1 |
| 42 | VI | Kim S 2021 (101) | 17 | 10 | 1 | 3 | NA |
| 43 | IV | Kodama S 2021 (102) | 33 | 7 | 0 | 2 | 0 |
| 44 | X | Komolafe T 2021 (103) | 19 | 2 | NA | NA | NA |
| 45 | II | Kourou K 2021 (104) | 921 | NA | NA | NA | NA |
| 46 | II | Kozikowski M 2021 (105) | 8 | 3 | 1 | 0 | 0 |
| 47 | II | Kuntz S 2021 (108) | 16 | 8 | 2 | 1 | 6 |
| 48 | II | La Greca Saint-Esteven 2021 (109) |  | 19 | 11 | 10 | 0 |
| 49 | II | Lecointre L 2021 (112) | 17 | 4 | 0 | 0 | 0 |
| 50 | XXI | Lequertier V 2021 (113) | 74 | 13 | NA | NA | NA |
| 51 | II | Li J 2021 (114) | 31 | 27 | 0 | 0 | 0 |
| 52 | II | Li M 2021 (115) | 252 | NA | NA | NA | NA |
| 53 | X | Locquet M 2021 (119) | 13 | NA | 4 | NA | NA |
| 54 | XIII | Lubelsk D 2021 (121) | 31 | NA | NA | NA | NA |
| 55 | VII | Maile H 2021 (122) | 26 | 9 | NA | NA | NA |
| 56 | XV | Mangold C 2021 (123) | 11 | 8 | NA | NA | NA |
| 57 | VI | Mari 2022 (124) | 44 | NA | NA | NA | NA |
| 58 | VI | Matsangidou M 2021 (125) | 26 | 16 | NA | 2 | NA |
| 59 | XIX | Mawdslay E 2021 (126) | 9 | 3 | 1 | NA | NA |
| 60 | VI | Mei J 2021 (128) | 209 | 119 | 1 | 51 | NA |
| 61 | V | Minissi M 2021 (131) | 11 | NA | 3 | NA | NA |
| 62 | V | Miranda L 2021 (132) | 20 | 1 | 2 | NA | NA |
| 63 | XXI | Moglia A 2021 (135) | 35 | NA | NA | NA | NA |
| 64 | X | Montazeri M 2021 (138) | 44 | 18 | NA | NA | NA |
| 65 | XXI | Moor M 2021 (139) | 22 | 14 | NA | 2 | NA |
| 66 | IX | Mpanya D 2021 (142) | 30 | NA | NA | NA | NA |
| 67 | XIX | Nadarajah R 2021 (146) | 11 | NA | NA | NA | NA |
| 68 | XXI | Naemi A 2021 (147) | 15 | 10 | 1 | NA | NA |
| 69 | II | Nguyen A 2018 (151) | 8 | 6 | NA | 2 | 4 |
| 70 | XIII | Ogink P 2021b (153) | 33 | 50 | 1 | 1 | NA |
| 71 | X | Ossai C 2021 (155) | 26 | 7 | 1 | NA | 3 |
| 72 | II | Patil S 2019 (158) | 7 | 5 | 0 | 0 | 0 |
| 73 | VI | Peralta M 2021 (159) | 73 | 26 | 1 | 13 | NA |
| 74 | XV | Persad E 2021 (160) | 36 | NA | NA | NA | NA |
| 75 | V | Quaak M 2021 (163) | 44 | 44 | NA | 4 | 1 |
| 76 | II | Ramesh S 2021 (165) | 42 | 19 | NA | 8 | 0 |
| 77 | XIX | Ramos-Lima L 2020 (166) | 49 | NA | NA | NA | NA |
| 78 | XIV | Rice P 2021 (169) | 8 | NA | NA | NA | NA |
| 79 | XIV | Salem H 2021 (174) | 138 | 54 | 1 | 12 | 14 |
| 80 | XIX | Senanayake S 2019 (181) | 18 | 7 | NA | NA | NA |
| 81 | XXI | Shillan D 2019 (184) | 258 | 146 | NA | 23 | 2 |
| 82 | IX | Shlobin N 2021 (186) | 40 | 14 | NA | 1 | 1 |
| 83 | I | Siddiqui S 2022 (187) | 45 |  |  |  | 1 |
| 84 | XIII | Smets J 2021 (188) | 89 | 46 | NA | 3 | 12 |
| 85 | XIV | Song X 2021 (191) | 24 | 15 | NA | NA | NA |
| 86 | IX | Stewart J 2021 (195) | 23 | NA | NA | NA | NA |
| 87 | II | Subramanian H 2021 (197) | 12 | 5 | NA | NA | 0 |
| 88 | X | Syeda H 2021 (198) | 130 | 2 | NA | NA | NA |
| 89 | II | Syer T 2021 (199) | 27 | 2 | 0 | 5 | 0 |
| 90 | IV | Tan K 2021 (201) | 32 | 10 | 9 | 2 | 0 |
| 91 | II | Tewarie I 2021 (203) | 27 | 3 | 3 | 4 | 0 |
| 92 | VI | Ugga L 2021 (205) | 8 | 65 | NA | NA | NA |
| 93 | II | van Kempen E 2021a (206) | 17 | NA | NA | NA | NA |
| 94 | II | van Kempen E 2021b (207) | 8 | NA | NA | NA | NA |
| 95 | II | Volpe S 2021 (208) | 48 | 2 | 0 | 0 | 1 |
| 96 | IX | Wang W 2020 (209) | 18 | 6 | 1 | 2 | NA |
| 97 | VI | Wongkoblap A 2017 (211) | 48 | 14 | NA | 2 | NA |
| 98 | VI | Xu L 2021 (213) | 28 | 8 | 3 | NA | NA |
| 99 | I | Yan M 2022 (214) | 9 | 2 | 0 | 0 | 0 |
| 100 | IX | Zhao Y 2021(222) | 48 | NA | NA | NA | NA |
| 101 | IV | Zheng Y 2022 (224) | 8 |  |  |  | 1 |
| 102 | XI | Zhou Y 2022(225) | 24 | 10 | 1 | 1 | NA |
| 103 | IV | Zhu T 2021 (226) | 40 | 10 | NA | 1 | 0 |
|  |  |  | **4,992** | **1,325** | **66** | **205** | **91**** |

*Number determined by review of primary studies; ** 90 without duplicates of primary studies.
