# Supplementary material for: Systematic Reviews of Machine Learning in Healthcare: A Literature Review
Source: Research Square preprint supplement (doi:10.21203/rs.3.rs-3035548/v1), 2023-06-16
Supplement: Supplementary file 2 [file c4c8e934ab2a6edfd02b865b.docx]

**Table 1.** Review of included systematic reviews.

|  | **Lead author**  **&year** | **Title** | **Databases searched** | **Total of studies included** | **Quality assessment** | **Area of focus (objective)** | **Size of study included** | | **Type of data** | **Reporting method** |
| --- | --- | --- | --- | --- | --- | --- | --- | --- | --- | --- |
| **N** | **min** | **max** |
| 1 | Abu Bakar 2021 (6) | The emergence of machine learning in auditory neural impairment: A systematic review. | Web of Science (WoS), Scopus, Science Direct, PubMed and Google Scholar | 11 | NA | predict categorize | 8 | 95 | ECG | none stated |
| 2 | Adamidi E 2021 (7) | Artificial intelligence in clinical care amidst COVID-19 pandemic: A systematic review | PubMed, Nature, Science Direct, IEEE Xplore, Arxiv and medRxiv | 101 | Covidence | predict categorize | 17 | 117,000 | Patients’ demographics and medical history, socioeconomic status, outcomes of HTAs, diagnostic images, lab results | PRISMA |
| 3 | Adeoye J 2021 (8) | Prediction models applying machine learning to oral cavity cancer outcomes: A systematic review | PubMed, Scopus, EMBASE, Cochrane Library, LILACS, SciELO, PsychINFO, and Web of Science | 27 | QUIPS tool | predict | 31 | 33,065 | no details provided | PRISMA |
| 4 | Ahsan MM 2022 (9) | Machine learning-based heart disease diagnosis: A systematic literature review | Scopus | 49 | NA | categorize discover | NA | NA | NA | PRISMA |
| 5 | Akazawa M 2021 (10) | Artificial intelligence in gynecologic cancers: Current status and future challenges – A systematic review | PubMed, Web of Science, and Scopus | 71 | PROBAST | discover | 20 | 78,215 | MRI/CT/ PET, clinical, cytology, ultrasound | PRISMA |
| 6 | Al Hinai G 2021 (11) | Deep learning analysis of resting electrocardiograms for the detection of myocardial dysfunction, hypertrophy, and ischaemia: a systematic review | PubMed MEDLINE | 12 | NA | categorize | 47 | 52,870 | ECG | PRISMA |
| 7 | Alabi R 2021 (12) | Machine learning in oral squamous cell carcinoma: Current status, clinical concerns and prospects for future—A systematic review | OvidMedline, PubMed, Scopus, Web of Science, and Institute of Electrical and Electronics Engineers (IEEE) | 41 | PROBAST | predict | 31 | 33,065 | NA | PRISMA |
| 8 | Albahri A 2020 (13) | Role of biological Data Mining and Machine Learning Techniques in Detecting and Diagnosing the Novel Coronavirus (COVID-19) - A Systematic Review | IEEE Xplore; Web of Science; PubMed; ScienceDirect; Scopus | 8 | NA | predict | 322 | 0.2 million | Public health and government agency databases; body-worn sensors and mobile applications; media articles and social media; electronic patient records; synthetic data | PRISMA |
| 9 | Alballa N 2021 (14) | Machine learning approaches in COVID-19 diagnosis, mortality, and severity risk prediction: A review | PubMed, Scopus, IEEE Xplore, and Google Scholar | 52 | NA | predict categorize | 47 | 22,095 | clinical test, demographic | PRISMA |
| 10 | Alharbi B 2022 (15) | Predictive models for personalized asthma attacks based on patient’s biosignals and environmental factors: a systematic review | PubMed, ScienceDirect, Springer, and IEEE | 15 | NA | predict | 1 | 500,000 | Telemonitoring data, randomly generated text, Historical data, ED visits, social media, sensors | PRISMA |
| 11 | Alhasan M 2021 (16) | Clinical Applications of Artificial Intelligence, Machine Learning, and Deep Learning in the Imaging of Gliomas: A Systematic Review | PubMed, Medline, Cumulative Index to Nursing and Allied Health Literature (CINAHL), Web of Science, and Google Scholar | 20 | QUADAS-2 | discover | 30 | 496 | MR images | PRISMA |
| 12 | Alsolai H (17) | A Systematic Review of Literature on Automated Sleep Scoring | NA | 27 | NA | categorize discover | NA | NA | ECG | PRISMA |
| 13 | Anteby R 2021 (18) | Deep learning for noninvasive liver fibrosis classification: A systematic review | Embase, MEDLINE, Web of Science and IEEE Xplore | 16 | QUADAS-2 | categorize | 34 | 8,352 | US, MRI and CT | PRISMA |
| 14 | Bang CS 2021a (19) | Computer-Aided Diagnosis of Gastrointestinal Ulcer and Hemorrhage Using Wireless Capsule Endoscopy: Systematic Review and Diagnostic Test Accuracy Meta-analysis | PubMed, Web of Science and Cochrane Library | 33 | QUADAS-2 | categorize | 10 | 33,009 | Still-cut images of endoscopy | PRISMA |
| 15 | Bang CS 2021b (20) | Computer-aided diagnosis of esophageal cancer and neoplasms in endoscopic images: a systematic review and meta-analysis of diagnostic test accuracy | MEDLINE-PubMed, Embase and the Cochrane Library | 21 | QUADAS-2 | categorize | 20 | 1,383 | white-light imaging; narrow-band imaging | PRISMA |
| 16 | Barrett L 2022 (21) | Systematic Review of Machine Learning Approaches for Detecting Developmental Stuttering | Medline, Springer, EMBASE, ISI Web of Knowledge/Science and the Institute of Electrical and Electronics Engineers (IEEE), Google Scholar, GitHub, OpenGrey and OpenDOAR | 27 | NA | categorize | 2 | 32,321 | Sound recordings | PRISMA |
| 17 | Bazoukis G 2021 (22) | Machine learning versus conventional clinical methods in guiding management of heart failure patients—a systematic review. | MEDLINE and Cochrane library | 122 | Qiao scorfe | discover | 30 | <100,000 | no details provided | PRISMA |
| 18 | Bedrikovetski S 2021a (23) | Artificial intelligence for pre-operative lymph node staging in colorectal cancer: a systematic review and meta-analysis | PubMed (MEDLINE), EMBASE, IEEE Xplore and the Cochrane Library | 17 | QUADAS-2 | predict | 17 | 414 | MRI and CT scans | PRISMA |
| 19 | Bedrikovetski S 2021b (24) | Artificial intelligence for the diagnosis of lymph node metastases in patients with abdominopelvic malignancy: A systematic review and meta-analysis. | PubMed, MEDLINE, Science Direct and IEEE Xplore | 21 | PROBAST | categorize | 17 | 1,689 | MRI and CT scans | PRISMA |
| 20 | Benoit J 2020 (25) | Systematic Review of Digital Phenotyping and Machine Learning in Psychosis Spectrum Illnesses | PubMed, Web of Science, PsycInfo, Embase, Cochrane Central Register of Controlled Trials | 51 (16 used ML) | NA | categorize | NA | NA | Physiological sensors and GPS, microphones, mobile- or computer-based applications | none listed |
| 21 | Bernert RA 2020 (26) | Artificial Intelligence and Suicide Prevention: A Systematic Review of Machine Learning Investigations | PubMed/MEDLINE, PsychInfo, Web-of-Science, EMBASE, Google Scholar, hand search | 87 | Oxford Center for Evidence-Based Medicine Protocol | categorize | 55 | 975,057 | clinical samples, emergency settings, epidemiologic surveys | EQUATOR/PRISMA |
| 22 | Bertl M 2022 (27) | A systematic literature review of AI-based digital decision support systems for post-traumatic stress disorder | Scopus | 30 | internal qualitative checklist | Categorize discover | 10 | 89,840 | Voice data, text data, checklists and questionnaires, bio signals, EMR | Kitchenham’s “Guidelines for performing Systematic Literature  Reviews in Software Engineering” |
| 23 | Binvignat M 2022 (28) | Use of machine learning in osteoarthritis research: a systematic literature review | MEDLINE Pubmed | 46 | NA | Categorize  discover | 18 | 5,749 | Imaging, clinical data, biological data | PRISMA |
| 24 | Boonstra A 2022 (29) | Influence of artificial intelligence on the work design of emergency department clinicians a systematic literature review | Smart-Cat, Web of Science, and PubMed | 34 | internal qualitative process | Predict Categorize discover | NA | NA | Not reported | PRISMA |
| 25 | Boyd C 2021 (30) | Machine Learning Quantitation of Cardiovascular and Cerebrovascular Disease: A Systematic Review of Clinical Applications | Ovid MEDLINE and Elsevier SCOP | 47 | NA | predict | 74 | 86,155 | CTA, ultrasound, MRI, Invasive Angiography | PRISMA |
| 26 | Bracher-Smith M 2021 (31) | Machine learning for genetic prediction of psychiatric disorders: a systematic review. | Medline via Ovid, PsychInfo, Web of Science and Scopus | 13 | PROBAST | predict | NA | NA | genome-wide association studies | PRISMA |
| 27 | Buchlak Q 2020 (32) | Machine learning applications to clinical decision support in neurosurgery: an artificial intelligence augmented systematic review | PubMed, Medline, Embase, Scopus | 70 | Prediction model Risk of Bias Assessment Tool (PROBAST) | categorize | 6 | 22,629 | Demographics data, clinical data/assessment, patient-reported outcomes, imaging data, lab tests, journals | PRISMA |
| 28 | Buisson M 2021 (33) | Deep learning versus ophthalmologists for screening for glaucoma on fundus examination: A systematic review and meta-analysis. | PubMed, Cochrane Library, Science Direct, Embase andClinicalTrials.go | 6 | QUADAS-2 | categorize | 86 | 490 | glaucoma fundus images | PRISMA |
| 29 | Cabitza F 2018 (34) | Machine Learning in Orthopedics: A Literature Review | Scopus and Medline | 70 | NA | predict | NA | NA | 80% imaging data, 20% sensor & biomechanical data, 15% patients data | none stated |
| 30 | Castaldo R 2021 (35) | Radiomic and Genomic Machine Learning Method Performance for Prostate Cancer Diagnosis: Systematic Literature Review. | PubMed, Scopus, and OvidSP databases | 29 | QUADAS-2 | categorize | 11 | 699 | MRI and lab test results | PRISMA |
| 31 | Cavus N 2021 (36) | A Systematic Literature Review on the Application of Machine-Learning Models in Behavioral Assessment of Autism Spectrum Disorder. | Web ofScience, PubMed, IEEEXplore, and Scopus | 22 | NA | categorize | NA | NA | data collection instruments are AQ-10, Q-CHAT-10, ADOS, ADI-R, and Social Responsive-ness Scale (SRS). Others include Autism Behavior Checklist, Aberrant BehaviorChecklist, Clinical Global Impression, and MCHAT-based Pictorial Autism AssessmentSchedule (PASS) | PRISMA |
| 32 | Celtikci E 2018 (37) | A Systematic Review on Machine Learning in Neurosurgery: The Future of Decision-Making in Patient Care | MEDLINE Cochrane Database of Systematic Reviews | 51 | NA | predict | NA | NA | Lab tests, clinical data/assessment, sensor recordings, physiological measurements, imaging data | PRISMA |
| 33 | Chandra G 2022 (38) | Systematic Literature Review on Application of Artificial Intelligence in Cancer Detection Using Image Processing | Science Direct, IEEEXplore, Radiology Society of  North America Journals | 24 | NA | categorize | NA | NA | Not reported | None stated |
| 34 | Chee M 2021 (39) | Artificial Intelligence Applications for COVID-19 in Intensive Care and Emergency Settings: A Systematic Review. | PubMed, Embase, Scopus, CINAHL,IEEE Xplore, and ACM Digital Library d | 14 | QUADAS-2 | predict discover | 20 | 49,623 | ED, ICU, or Prehospital | PRISMA |
| 35 | Chiesa-Estomba C 2021 (40) | Machine Learning Algorithms as a Computer-Assisted Decision Tool for Oral Cancer Prognosis and Management Decisions: A Systematic Review | PubMed, Google Scholar, SciELO, and Scopus | 8 | ROBIN-I | predict | 31 | 33,065 | Social demographic, clinical, imaging, tissue genomic, and blood genomic | PRISMA |
| 36 | Cho S 2021 (41) | Brain metastasis detection using machine learning: a systematic review and meta-analysis. | MEDLINE and EMBASE | 12 | QUADAS-2 | categorize | 26 | 1,632 | MRI scans | PRISMA |
| 37 | Choudhury A 2020a (42) | Role of Artificial Inteligence in patient safety outcomes: systematic literature review | PubMed, WorldCat, MEDLINE, ProQuest, ScienceDirect, SpringerLink, Wiley, and ERIC | 35 | NA | predict | 27 | 3,377 | 55%-public databases, 30% - hospital databases, 15%- clinical trials | PRISMA |
| 38 | Choudhury A 2020b (43) | Use of machine learning in geriatric clinical care for chronic diseases: a systematic literature review | PubMed, PubMed Central, Web of Science | 53 | NA | categorize | NA | NA | adverse drug events, drug safetyreports, clinical alerts | PRISMA |
| 39 | da Silva Neto S 2022 (44) | Machine learning and deep learning techniques to support clinical diagnosis of arboviral diseases: A systematic review. | GoogleScholar | 15 | NA | categorize | 20 | 14,019 | Demographic, epidemiological and clinical data | PRISMA |
| 40 | Dallora A 2017 (45) | Machine learning and microsimulation techniques on the prognosis of dementia: A systematic literature review. | Pubmed, Scopus and Web of Science | 26 | Kitchenham’s guidelines | predict | 79 | 8,325 | imagining (MRI, Radiograph, CT) | PRISMA |
| 41 | Dallora A 2019 (46) | Bone age assessment with various machine learning techniques: A systematic literature review and meta-analysis | Pubmed, Web of Science, Scopus | 37 | Kitchenham’s guidelines | predict | NA | NA | 95% -neuroimaging, 32%- lab test, 20%- demographics & cognitive measures (neuropsychological),15% - genetic data | PRISMA |
| 42 | Daniel 2023 (47) | A systematic literature review of machine learning application in COVID-19 medical image classification | Google Scholar | 19 | NA | Categorize | NA | NA | Imaging | Maniah et al. 2021 (332) |
| 43 | D'Antoni F 2021 (48) | Artificial Intelligence and Computer Vision in Low Back Pain: A Systematic Review. | PubMed | 76 | QUADAS-2 | predict categorize | 4 | 39,295 | MRI, ultrasound, X-rays, and Computed Tomography (CT) | PRISMA |
| 44 | Das PK 2022 (49) | A Systematic Review on Recent Advancements in Deep and Machine Learning Based Detection and Classification of Acute Lymphoblastic Leukemia | Not specified | 29 | NA | Categorize | NA | NA | Imaging | None stated |
| 45 | Das T 2022 (50) | Intersection of network medicine and machine learning towards investigating the key biomarkers and pathways underlying amyotrophic lateral sclerosis: a systematic review | MEDLINE,  PubMed Central, Bookshelf | 109 | NA | Categorize | 5 | 26,898 | Demographic, epidemiological, clinical, signs, comorbidities | PRISMA |
| 46 | de Bardeci M 2021 (51) | Deep learning applied to electroencephalogram data in mental disorders: A systematic review. | PubMed | 30 | NA | predict categorize | 8 | 178 | EEG | PRISMA |
| 47 | Decharatanachart P 2021a (52) | Application of artificial intelligence in chronic liver diseases: a systematic review and meta-analysis | MEDLINE, Scopus, Web of Science and Google Scholar | 19 | QUADAS-2 | categorize | NA | NA | imaging (elastography, ultrasound, MRI, CT), lab and clinical tests | PRISMA |
| 48 | Decharatanachart P 2021b (53) | Application of artificial intelligence in non-alcoholic fatty liver disease and liver fibrosis: a systematic review and meta-analysis. | MEDLINE, Scopus, Web of Science, and Google Scholar | 25 | QUADAS-2 | categorize | 30 | 13,030 | Ultrasonography, Elastography, MRI, liver biopsy | PRISMA |
| 49 | DelSole E 2021 (54) | The State of Machine Learning in Spine Surgery: A Systematic Review. | PubMed, Ovid, and Web of Science | 44 | NA | predict | 27 | 1,106, 234 | scans and patients data | PRISMA |
| 50 | Dogan O 2021 (55) | A systematic review on AI/ML approaches against COVID-19 outbreak. | ACM Digital Library, ArXiv.org, Elsevier, IEEE Xplore Digital Library, PubMed, Springer, Wiley Online Library | 264 | NA | predict discover | NA | NA | CT, x-rays , case data | NA |
| 51 | Dudchenko A 2020 (56) | Machine Learning Algorithms in Cardiology Domain: A Systematic Review | PubMed | 27 | NA | categorize | NA | NA | Private and public datasets and repositories | PRISMA |
| 52 | Ebrahimi A 2021 (57) | Predicting the Risk of Alcohol Use Disorder Using Machine Learning: A Systematic Literature Review. | Medline, Embase, Inspec, ScienceDirect, Web of Science, andIEEE Xplore | 12 | NA | predict | 106 | 43,545 | demographic, alcohol behaviour, EEC, family history, clinical | PRISMA |
| 53 | Ebrahimighahnavieh A 2020 (58) | Deep learning to detect Alzheimer’s disease from neuroimaging: A systematic literature review | IEEE Xplore, ScienceDirect, SpringerLink, ACM digital libraries Web of Science Scopus Google Scholar | 114 | Own model based on article type, scientific impact, study size and completeness | categorize | NA | NA | imaging from MRI, PET, CSF | none listed |
| 54 | El-Daw S 2021 (59) | Role of machine learning in management of degenerative spondylolisthesis: A systematic review. | PubMed, Medline, Cinahl, Allied and Complementary Medical Database (AMED), Cochrane Register of Controlled trials, Embase, Elsevier clinical key, Scopus | 8 | NA | predict categorize | NA | NA | scans, medical notes | PRISMA |
| 55 | Falconer N 2021 (60) | Systematic review of machine learning models for personalised dosing of heparin. | PubMed, Embase, International Pharmaceutical Databases (IPA), CINAHL, Web of Science and IEEE Xplore | 8 | CHAMS | predict discover | 159 | 4,908 | patients demographic, vitals, lab results | PRISMA |
| 56 | Farook T 2021 (61) | Machine Learning and Intelligent Diagnostics in Dental and Orofacial Pain Management: A Systematic Review | Scopus, PubMed, and Web of Science | 34 | Cochrane GradePro (GRADE approach) | categorize | 45 | 11,198 | Dental images, pateints records | PRISMA |
| 57 | Fernandes F 2021 (62) | Biomedical signals and machine learning in amyotrophic lateral sclerosis: a systematic review. | IEEE Xplore, Web of Science, Science Direct, Springer, and PubMed | 18 | NA | discover | 5 | 265 | EMG, EEG, GR, and MRI | PRISMA |
| 58 | Fregoso-Aparicio L 2021 (63) | Machine learning and deep learning predictive models for type 2 diabetes: a systematic review. | PubMed, Web of Science | 90 | not defined as standard | predict discover | 145 | 41,000,000 | demographic, vitals, medical history | PRISMA |
| 59 | Frondelius T 2022 (64) | Diagnostic and prognostic prediction models in ventilator-associated pneumonia: Systematic review and meta-analysis of prediction modelling studies. | ACM Digital Library/ ACM Guide to Computing Literature, Astrophysics Data System, arXiV, IEEE Xplore Digital Library, Academic Search Ultimate, Cumulative Index to Nursing and Allied Health Literature [CINAHL], CT.gov, PubMed [Medline], Scopus, Web of Science | 20 | PROBAST | predict | 12 | 1,438,035 | Sensor array response data, Acoustic wave based electronic nose system, GC–MS data | PRISMA |
| 60 | Fusco R 2021 (65) | Artificial intelligence and covid-19 using chest ct scan and chest x-ray images: Machine learning and deep learning approaches for diagnosis and treatment. | PubMed, Scopus, Web of Science, Google Scholar | 23 | NA | predict categorize | 50 | 2,905 | CXR, CT scans | NA |
| 61 | Garrow C 2021 (66) | Machine Learning for Surgical Phase Recognition | PubMed, Web of Science, IEEExplore, GoogleScholar, and CiteSeerX | 35 | AMSTAR-2 | discover | 4 | 340 | Intraoperative characteristics; instrument use-manual annotation; instrument use-RF ID tags; instrument use - automatic detection from video; Feature extraction from video; feature learning from video | Cochrane recommendations, PRISMA |
| 62 | Ghaderzadeh M 2019 (67) | Deep Learning in the Detection and Diagnosis of COVID-19 Using Radiology Modalities: A Systematic Review | PubMed, Scopus, and Web of Science | 37 | NA | categorize | 227 | 11,302 | Imaging (all) | PRISMA |
| 63 | Grueso S 2021 (68) | Machine learning methods for predicting progression from mild cognitive impairment to Alzheimer's disease dementia: a systematic review. | PubMed, PsycINFO and Web of Science | 116 | Cochrane guidelines for systematic reviews | predict | 10 | 2,084 | MRI was the most common kind of neuroimaging used (in 76 out of 116 studies), followed by PET (11 studies), 26 studies included data from both techniques (MRI and PET), two studies used magnetoencephalography (MEG) data, and one study used MRI and MEG data. | PRISMA |
| 64 | Gutiérrez-Tobal G 2021 (69) | Reliability of machine learning to diagnose pediatric obstructive sleep apnea: Systematic review and meta‐analysis | WoS and Scopus | 19 | NA | categorize | 25 | 3,602 | Clinical+ Anthropometrics+Demographics+SpO2 | PRISMA |
| 65 | Haggenmuller S 2021 (70) | Skin cancer classification via convolutional neural networks: systematic review of studies involving human experts | PubMed, Medline and ScienceDirect | 19 | NA | categorize | NA | NA | dermoscopic images | PRISMA |
| 66 | Hameed B 2021 (71) | The Ascent of Artificial Intelligence in Endourology: a Systematic Review Over the Last 2 Decades | MEDLINE, Scopus, CINAHL, Clinicaltrials.gov, EMBASE, Cochrane library, Google Scholar, and Web of Science | 58 | NA | predict categorize | 31 | 46,891 | Patients with kidney stone disease undergoing imaging for the diagnosis of stone disease | PRISMA |
| 67 | Hasan N 2021 (72) | Understanding current states of machine learning approaches in medical informatics: a systematic literature review | Elsevier, IEEE Xplore, PubMed, and Google Scholar. PLOS ONE | 51 | Journals impact factors | discover | NA | NA | ML algorithms identified in the medical informatic domain. | PRISMA |
| 68 | Hassan N 2021 (73) | Preventing sepsis; how can artificial intelligence inform the clinical decision-making process? A systematic review | Medline, Cumulative Index of Nursing and Allied Health Literature, and Embase | 17 | NA | predict | NA | NA | Machine learning algorithms, predictive power and sepsis definition used. | PRISMA |
| 69 | Henn J 2021 (74) | Machine learning to guide clinical decision‑making in abdominal surgery—a systematic literature review | PubMed | 47 | NA | discover | 60 | 1,049,160 | Surgical domain, predicted outcome, outcome variable, patients, study period, ML, predictors, cross-validation, and benchmark | PROSPERO |
| 70 | Hickman S 2021 (75) | Machine Learning for Workflow Applications in Screening Mammography: Systematic Review and Meta-Analysis | Ovid Embase, Ovid Medline, Cochrane Central Register of Controlled Trials, Scopus, and Web of Science literature | 14 | QUDAS-2 | categorize | 653 | 25, 856 | Number of cancer images, database used, patient age, screening or diagnostic mammograms, breast density | PRISMA |
| 71 | Hinterwimmer F 2021 (76) | Machine learning in knee arthroplasty: specific data are key—a systematic review | PubMed, Medline database and the Cochrane Library | 19 | NA | predict | 6 | 1,049,160 | complications, costs, functional outcome, revision, postoperative satisfaction, surgical technique and biomechanical properties were investigated | none stated |
| 72 | Hoekstra O 2022 (77) | Healthcare related event prediction from textual data with machine learning: A Systematic Literature Review | PubMed, IEEE  Xplore and Web of Science | 35 | Internal qualitative process | predict | NA | NA | Electronic Medical Records (text) | Kitshenham et al. 2009 (333) |
| 73 | Hoodbhoy Z 2021 (78) | Machine Learning for Child and Adolescent Health: A Systematic Review | Medline, the Cochrane Library, the Cumulative Index to Nursing and Allied Health Literature Plus, Web of Science Library, and EBSCO Dentistry & Oral Science Source. | 363 | NA | discover | 6 | 125,940 | year of publication, geographical location, age range, number of participant, disease or condition under investigation, study methodology, reference standard, type, category, and performance of ML algorithms | PRISMA |
| 74 | Hosni M 2019 (79) | Reviewing ensemble classification methods in breast cancer | IEEE Xplore, ACM digital library, Scopus and PubMed | 193 | NA | predict | NA | NA | imaging, clinical and non-clinical records, genetic, lab tests, epidemiological data, biomarkers from public and private databases, registers | Kitchenham and Charters; Peterson guidlines for systematic mapping studies in software engineering |
| 75 | Hoyos W 2021 (80) | Dengue models based on machine learning techniques: A systematic literature review | ScienceDirect, IEEE Xplorer, Google Scholar, Emerald, Taylor & Francis and PubMed | 64 | NA | categorize | NA | NA | diagnostic, epidemic and intervention modeling of dengue. | PRISMA |
| 76 | Huang J 2021 (81) | Deep Learning for Outcome Prediction in Neurosurgery: A Systematic Review of Design, Reporting, and Reproducibility | PubMed, Scopus, and Embase databases | 35 | Probast | predict | 17 | 101,654 | characteristics of DL studies involving neurosurgical outcome prediction and to assess their bias and reporting quality (year, country, disease, procedure, outcome, predictors data source, data set size, model type, key findings. Potential sources of bias) | PRISMA |
| 77 | Huang S 2021 (82) | A systematic review of machine learning and automation in burn wound evaluation: A promising but developing frontier | PubMedand MEDLINE (OVID) | 30 | not stated | discover | 1 | 1,500 | study design, method of data acquisition, machine learning techniques, and machine learning accuracy | PRISMA |
| 78 | Huang Z 2021 (83) | Prediction of the obstruction sites in the upper airway in sleep disordered breathing based on snoring sound parameters: a systematic review | PubMed, Embase.com, CENTRAL, Web of Science, and Scopus in collaboration with a medical librarian. | 28 | AXIS | predict | 9 | 90 | Population, snoring sound parameter, Identification of the obstruction site, main finding | PRISMA |
| 79 | Ibrahim B 2021 (84) | Diagnostic power of resting-state fMRI for detection of network connectivity in Alzheimer's disease and mild cognitive impairment: A systematic review | Scopus, PubMed, DOAJ, and Google Schola | 36 | QUADAS | categorize | 15 | 291 | number of subjects (patients and controls), age of the subjects, MMSE scores, rs-fMRI imaging protocol, and analysis method, sensitivity scores, and specificity scores | PRISMA |
| 80 | Infante T 2021 (85) | Radiogenomics and artificial Intelligence approaches applied to cardiac computed tomography angiography and cardic magnetic resonance for precision medicine in coronary heart disease : A Systematic Review | PubMed, Scopus database | 60 | NA | discover | 27 | 5,065 | Imaging protocol, participants, extracted feature categories, performance in terms of AUC | none stated |
| 81 | Irgang L 2023 (86) | Data-Driven Technologies as Enablers for Value Creation in the Prevention of Surgical Site Infections: a Systematic Review | Scopus, Web of Science, MEDLINE, ProQuest, PubMed, ABI/ Inform Global, and Cochrane | 59 | NA | categorize | NA | NA | EMR | PRISMA |
| 82 | Islam MN 2022 (87) | Machine learning to predict pregnancy outcomes: a systematic review, synthesizing framework and future research agenda | Google Scholar, SpringerLink, IEEE  Xplore, ScienceDirect, etc. | 26 | NA | predict | NA | NA | Electronic Medical Records (text) | Kitshenham et al. 2009 (333) |
| 83 | Jiang K 2021 (88) | Current Evidence and Future Perspective of Accuracy of Artificial Intelligence Application for Early Gastric Cancer Diagnosis With Endoscopy: A Systematic and Meta-Analysis | PubMed, MEDLINE, Embase and the Cochrane Library Databases | 16 | QUADAS | categorize | NA | NA | endoscopic detection of EGC, AUC | PRISMA |
| 84 | Jiang M 2021 (89) | Using Machine Learning Technologies in Pressure Injury Management: Systematic Review | PubMed, EMBASE, Web of Science, Cumulative Index to Nursing and Allied Health Literature (CINAHL), Cochrane Library, China National Knowledge Infrastructure (CNKI), the Wanfang database, the VIP database, and the China Biomedical Literature Database (CBM) t | 32 | NA | discover | NA | NA | Study outcomes, performance of the algorithm, and findings | PRISMA |
| 85 | Jones O 2020 (90) | Artificial Intelligence Techniques That May Be Applied to Primary Care Data to Facilitate Earlier Diagnosis of Cancer: Systematic Review | MEDLINE, Embase, SCOPUS, and Web of Science databases | 16 | QUADAS | categorize discover | NR | NR | positive predictive value (PPV), negative predictive value (NPV), area under the receiver operating characteristic (AUROC) curve, types of AI used, the type of data used to train and test the algorithms, | PRISMA |
| 86 | Kalhori S 2021 (91) | Enhanced childhood diseases treatment using computational models: Systematic review of intelligent experiments heading to precision medicine | PubMed, Web of Science, Scopus, and EMBASE | 62 | NA | discover | 6 | 68,921 | NA | PRISMA |
| 87 | Kareemi H 2020 (92) | Machine Learning Versus Usual Care for Diagnostic and Prognostic Prediction in the Emergency Department: A Systematic Review | MEDLINE, Embase, Central, and CINAHL | 23 | PROBAST | predict categorize | 170 | 10,967,518 | Prediction performance metric of model discrimination (e.g., AUROC), calibration (e.g., calibration plot slope), or classification (e.g., sensitivity, specificity). | PRISMA |
| 88 | Karwath A 2021 (93) | Redefining β-blocker response in heart failure patients with sinus rhythm and atrial fibrillation: a machine learning cluster analysis | PubMed |  | NA | predict | NR | NR | all-cause mortality | none stated |
| 89 | Kassem M 2021 (94) | Machine Learning and Deep Learning Methods for Skin Lesion Classification and Diagnosis: A Systematic Review | MedNode, DermaIS, DermQuest, the ISIC 2016, 2017, 2018, and 2019, Ph2 | 49 | NA | categorize | NR | NR | MedNode, DermaIS, DermQuest, ISIC 2016, 2017, 2018, and 2019, Ph2, and Dermofit, EDRA, | PRISMA |
| 90 | Kausch S 2021 (95) | Physiological machine learning models for prediction of sepsis in hospitalized adults: An integrative review | PubMed, CINAHL, and Cochrane | 14 | NA | predict | 67 | 3,845 | study population, outcome measure (i.e., sepsis-1, sepsis-3, septic shock), statistical analysis for model development, model characteristics, and model validation measures (i.e., AUROC) | PRISMA |
| 91 | Kawamoto A 2022 (96) | Systematic review of artificial intelligence-based image diagnosis for inflammatory bowel disease | PubMed | 27 | NA | predict | NA | NA | Clinical data, laboratory data, imaging | PRISMA |
| 92 | Kedra J 2019 (97) | Current status of use of big data and artificial intelligence in RMDs: a systematic literature review informing EULAR recommendations | PubMed MEDLINE | 110 | NA | predict categorize discover | 5 (Units of observation) | 140 mln (Units of observation) | 31% clinical, 31% biological and 29% imaging sources | Cochrane Collaboration handbook |
| 93 | Kennedy EE 2022 (98) | Systematic review of prediction models for postacute care destination decision-making | PubMed,  CINAHL, and Embase | 28 | PROBAST | predict | NA | NA | EMR | PRISMA + CHARMS |
| 94 | Khanagar S 2021 (99) | Application and Performance of Artificial Intelligence Technology in Oral Cancer Diagnosis and Prediction of Prognosis | PRISMA, PubMed, Google Scholar, Scopus, Embase, Cochrane, Web of Science, and the Saudi Digital Library for articles | 16 | QUADAS-2 | categorize | 10 | 33,065 | neural networks | PRISMA |
| 95 | Kim HR 2022 (100) | Analyzing adverse drug reaction using statistical and machine learning methods: A systematic review | EMBASE and PubMed | 72 | ROBIS | discover | NA | NA | EMR | PRISMA |
| 96 | Kim S 2021 (101) | Recent Trends of artificial intelligence and machine learning for insomnia research | PubMed; Systematic Reviews; meta Analysis; PRISMA | 17 | NA | discover | 7 | 807 | Brain volume cortical thickness, Hypnogra, EEG, ECG | PRISMA |
| 97 | Kodama S 2021 (102) | Ability of Current machine learning algorithms to predict and detect hypoglycemia in patients with Diabetes Mellitus: Meta-analysis | EMBASE , MEDLINE | 33 | QUADAS-2 | predict | 2 | 453,487 | number of study participants, N-total, N-hypo, mean or range of the patients’ age, time of day of hypoglycemic events, place of supposed hypoglycemic episode (ie, experimental, in-hospital, and out-of-hospital), ML algorithm used for classification | Electronic Literature searches |
| 98 | Komolafe T 2021 (103) | Diagnostic Test Accuracy of Deep Learning Detection of COVID-19: A Systematic Review and Meta-Analysis | PubMed, Web of Science and Inspec | 19 | QUADAS | categorize | 51 | 3,342 | data partitioning, training model, deep learning techniques, training parameter, the total number of positive (cohort) vs control (negative) and other valuable information. | PRISMA |
| 99 | Kourou K 2021 (104) | Applied machine learning in cancer research: A systematic review for patient diagnosis, classification and prognosis | PubMed and dblp | 921 | NA | categorize | NR | NR | disease diagnosis, patient classification and cancer prognosis and survival | none stated |
| 100 | Kozikowski M 2021 (105) | Role of Radiomics in the Prediction of Muscle-invasive Bladder Cancer: A Systematic Review and Meta-analysis | PubMed ; EMBASE; PRISMA-DTA, | 8 | QUADAS-2 | Predict | 54 | 218 | Number of lesions, surgical technique, pathological stage, Imaging characteristics | PRISMA |
| 101 | Kumar S 2021 (106) | Machine learning for modeling the progression of Alzheimer disease dementia using clinical data: a systematic literature review | PubMed, Scopus, ScienceDirect, IEEE Explore Digital Library, Association for Computing Machinery Digital Library, and arXiv. | 64 | NA | predict | NR | NR | laboratory results, vital signs, neurobehavioral status exam scores, demographic information, and comorbidities, along with neuroimaging scans and CSF biomarkers | PRISMA |
| 102 | Kumar Y 2021 (107) | A Systematic Review of Artificial Intelligence Techniques in Cancer Prediction and Diagnosis | web of science, EBSCO, and EMBASE | 185 | NA | categorize | NA | NA | MRIs images, CT images and other diagnostic images of various cancer types | PRISMA |
| 103 | Kuntz S 2021 (108) | Gastrointestinal cancer classification and prognostication from histology using deep learning: Systematic review | Pubmed and Medline | 16 | NA | predict discover | 30 | 1,122 | area under the receiver operating characteristic, cancer type, study classification | PRISMA |
| 104 | La Greca Saint-Esteven A 2021 (109) | Systematic Review on the Association of Radiomics with Tumor Biological Endpoints | PubMed | 104 | NA | predict discover | 45 | 260 | biological endpoint and its alteration, e.g., mutation on a specific exon, over-expression, etc.; the imaging modality; the origin of the dataset; the training set size  NA | PRISMA |
| 105 | Langarizadeh M 2021 (110) | Machine Learning Techniques for Diagnosis of Lower Gastrointestinal Cancer: A Systematic Review | Google Scholar, Scopus, ProQuest, PubMed, Web of Science, Cochrane, and SID as a Persian database | 44 | NA | categorize | NR | NR | machine learning model and algorithm, sample size, the type of data, and the results of the model. | PRISMA |
| 106 | Le Glaz A 2021 (111) | Machine Learning and Natural Language Processing in Mental Health: Systematic Review | PubMed, Scopus, ScienceDirect, and PsycINFO | 58 | NA | discover | NA | NA | precise topic of mental health (eg, autism, psychotic spectrum disordered), population characteristics, and types of recorded data | PRISMA |
| 107 | Lecointre L 2021 (112) | Artificial intelligence-based radiomics models in endometrial cancer: A systematic review | Pubmed and Medline | 17 | NA | predict discover | 24 | 622 | imaging technique used, sample size (training, validation and testing), model type (Machine learning or Deep Learning), classifier and diagnostic performance metrics | none stated |
| 108 | Lequertier V 2021 (113) | Hospital Length of Stay Prediction Methods A Systematic Review | PubMed, ScienceDirect, and arXiv databases. | 74 | TRIPOD | predict | 1065 | 3,517,950 | sample with number of hospitals and inpatient stays, data sources and input variables used by the prediction models, reimputation strategies for missing data, LOS modeling format with potential transformations, validation study design, employed LOS prediction methods, and performance evaluation metrics | PRISMA |
| 109 | Li J 2021 (114) | Predicting breast cancer 5-year survival using machine learning: A systematic review | PubMed (including MEDLINE), Embase, and Web of Science Core | 31 | PROBAST | predict | 200 | 202,932 | Disease characters, and predicted outcome, data source, data type, number of centers, and number of samples, number of candidate predictors used, ML algorithms, model presentation | PRISMA |
| 110 | Li M 2021 (115) | Artificial intelligence applied to musculoskeletal oncology: a systematic review | PubMed | 252 | NA | discover | NA | NA | machine learning techniques | none stated |
| 111 | Li Y 2021 (116) | Applications of artificial intelligence (AI) in researches on non‑alcoholic fatty liver disease(NAFLD) : A systematic review |  | 22 | NA | predict discover | NA | NA | Qualitative analysis for applications of AI in NAFLD | none stated |
| 112 | Librenza-Garcia D 2017 (117) | The impact of machine learning techniques in the study of bipolar disorder: A systematic review | PubMed, Embase and Web of Science | 51 | NA | predict categorize | 30 | 4,488 | imaging, clinical tests and scales, lab data, | PRISMA |
| 113 | Lima CLD 2022 (118) | Temporal and Spatiotemporal Arboviruses Forecasting by Machine Learning: A Systematic Review | IEE Xplore, PubMed, Science Direct,  Springer Link, and Scopus | 139 | NA | predict | NA | NA | Epidemiological data | none stated |
| 114 | Locquet M 2021 (119) | A systematic review of prediction models to diagnose COVID-19 in adults admitted to healthcare centers | MEDLINE and Scopus databases | 13 | PROBAST | predict | 8 | 71 | characterization of predictors and outcome, model development, model performance | PRISMA |
| 115 | Lopez C 2021 (120) | Artificial Learning and Machine Learning Decision Guidance Applications in Total Hip and Knee Arthroplasty: A Systematic Review | EMBASE, Medline, and PubMed | 49 | NA | discover | 25 | 262,290 | AI/ML methods and clinical applications, surgical domain, data sources, input variables and output variables, sample size, average patient age, percent female patients, | PRISMA |
| 116 | Lubelski D 2021 (121) | Prediction Models in Degenerative Spine Surgery: A Systematic Review | PubMed/Medline and Embase databases | 31 | NA | predict | 40 | 8,435 | functional/disability/pain scores or more objective measures such as LOS, reoperation, readmission, and complications | PRISMA |
| 117 | Maile H 2021 (122) | Machine Learning Algorithms to Detect Subclinical Keratoconus: Systematic Review | MEDLINE, Embase, and Web of Science and Cochrane Library | 26 | QUADAS | categorize | 15 | 791 | diagnosis details, validation details, input details, input types, method, classification groups, sensitivity, specificity, accuracy, precision, area under the receiver-operating characteristic curve (AUC), and source code availability | PRISMA |
| 118 | Mangold C 2021 (123) | Machine Learning Models for Predicting Neonatal Mortality: A Systematic Review | PubMed, Cochrane, OVID, and Google Scholar | 11 | NA | predict | 506 | 481,058 | mortality during the, neonatal period, ML data | PRISMA |
| 119 | Mari 2022 (124) | Systematic Review of the Effectiveness of Machine Learning Algorithms for Classifying Pain Intensity Phenotype or Treatment Outcomes Using Electroencephalogram Data. | MEDLINE, EMBASE, Web of Science, PsycINFO and The Cochrane Library | 44 | PROBAST | predict | 13 | 342 | EEG data | none stated |
| 120 | Matsangidou M 2021 (125) | Machine Learning in Pain Medicine: An Up-To-Date Systematic Review. | PUBMED | 26 | NA | categorize discover | 10 | 20,716 | quantitative kinematic data, electromyographic data, Fmri data, accelerometer data, EEG data, X-rays, sleep scans, clinical data | none stated |
| 121 | Mawdslay E 2021 (126) | A systematic review of the effectiveness of machine learning for predicting psychosocial outcomes in acquired brain injury: Which algorithms are used and why? | MEDLINE (PubMed), Web of Science, EMBASE (OVID interface, 1990 onwards), CINAHL, and PsycINFO | 9 | PROBAST | predict | 100 | 17,132 | time to symptom resolve, depression, post-concussive symptoms, antidepressant use | none stated |
| 122 | Medic G 2019 (127) | Evidence-based Clinical Decision Support Systems for the prediction and detection of three disease states in critical care: A systematic literature review | PubMed, ClinicalTrials.gov and Cochrane Database of Systematic Reviews | 20 (shock), 22 (respiratory), 31 (sepsis) | NA | predtict | 36 (shock), 22 (respiratory), 31 (sepsis) | 359,350 (shock), 22 (respiratory), 31 (sepsis) | EHRs, clinical/sensor physiological data | PRISMA |
| 123 | Mei J 2021 (128) | Machine Learning for the Diagnosis of Parkinson's Disease: A Review of Literature. | IEEE Xplore, Pubmed | 209 | NA | categorize | 10 | 2,289 | voice recordings, movement data, or handwritten patterns, MRI, SPECT, PET, CSF samples, electromyography, OCT, cardiac scintigraphy, Patient Questionnaire of Movement Disorder Society Unified Parkinson’s Disease Rating Scale, wholeblood gene expression profiles, transcranial sonography, eye movements, electroencephalography (EEG), and serum samples. | none stated |
| 124 | Mellia J 2021 (129) | Natural Language Processing in Surgery A Systematic Review and Meta-analysis. | PubMed, MEDLINE, Web of Science, and Embase | 29 | NA | discover | NA | NA | EHRs, clinical/sensor physiological data | none stated |
| 125 | Miltiadous A 2023 (130) | Machine Learning Algorithms for Epilepsy Detection Based on Published EEG Databases: A Systematic Review | Elsevier's Scopus, IEEE  Xplore, Elsevier's ScienceDirect and MEDLINE PubMed | 190 | NA | predict | NA | NA | EEG | PRISMA |
| 126 | Minissi M 2021 (131) | Assessment of the Autism Spectrum Disorder Based on Machine Learning and Social Visual Attention: A Systematic Review. | PubMed Central and Scopus | 11 | NA | discover | 28 | 189 | eye movements | none stated |
| 127 | Miranda L 2021 (132) | Systematic Review of Functional MRI Applications for Psychiatric Disease Subtyping. | PubMed | 20 | NA | discover | 20 | 1,872 | functional magnetic resonance imaging (fMRI) | none stated |
| 128 | Mirzania D 2021 (133) | Applications of deep learning in detection of glaucoma: A systematic review. | Medline, Web of Science, and Embase | 29 | NA | categorize | 551 (images) | 197,085 (images) | fundus images of the retina, optical coherence tomography (OCT), visual field testing | none stated |
| 129 | Moezzi M 2021 (134) | The diagnostic accuracy of Artificial Intelligence-Assisted CT imaging in COVID-19 disease: A systematic review and meta-analysis. | ISI Web of Science, Cochrane Library, PubMed, Scopus, CINAHL, Science Direct, PROSPERO, and EMBASE | 36 | QUADAS-2 | categorize | 46 | 3,102 | CT-SCANS | none stated |
| 130 | Moglia A 2021 (135) | A systematic review on artificial intelligence in robot-assisted surgery | PubMed, Web of Science, Scopus, and IEEExplore | 35 | AMSTAR-2 | discover | 3 | 86 | Kinematic data and video frames | none stated |
| 131 | Mohan B 2021 (136) | High pooled performance of convolutional neural networks in computer-aided diagnosis of GI ulcers and/or hemorrhage on wireless capsule endoscopy images: a systematic review and meta-analysis | ClinicalTrials.gov, Ovid EBM Reviews, Ovid, Embase, Ovid Medline, Scopus and Web of Science | 9 | NA | categorize | 105 images | 5,000 cases (113,268,334 images) | studies that tested a deep CNN learning model for the detection and/or diagnosis of GI ulcers and/or hemorrhage on WCE | none stated |
| 132 | Mondal M 2021 (137) | Diagnosis of COVID-19 Using Machine Learning and Deep Learning: A Review | IEEE, Science Direct, Springer Nature, MDPI, Wiley, Bentham Science, Arxiv, Medrxiv | 52 | NA | categorize | 1 | 5,644 | X-rays, CT scans, ultrasounds | none stated |
| 133 | Montazeri M 2021 (138) | Machine Learning Models for Image-Based Diagnosis and Prognosis of COVID-19: Systematic Review. | PubMed, Web of Science, IEEE, ProQuest, Scopus, bioRxiv, and medRxiv | 44 | PROBAST | categorize | 75 | 32,583 | CT scans, CXR, CT, CXR, lung ultrasound, and other information such as the patient’s age and medical history | none stated |
| 134 | Moor M 2021 (139) | Early Prediction of Sepsis in the ICU Using Machine Learning: A Systematic Review. | Embase, Google Scholar, PubMed/Medline, Scopus, and Web of Science | 22 | criteria adapted from Qiao | predict | 25 | 36 ,176 | Demographics, labs, vitals, comorbidities, diagnoses, images, clinical parameters, cytokine mRNA expression | none stated |
| 135 | Moshawrab M 2023 (140) | Smart Wearables for the Detection of Cardiovascular Diseases: A Systematic Literature Review | IEEE, PubMed, and Scopus | 87 | NA | Discover  predict | NA | NA | Wearable data | PRISMA |
| 136 | Moura F 2021 (141) | Artificial intelligence in the management and treatment of burns: a systematic review. | MEDLINE, Embase and PubMed | 46 | NA | discover | 5 | 66,611 | survival/mortality; assessment of burn depth; estimation of body surface area; antibiotic response/sepsis; other miscellaneous applications | none stated |
| 137 | Mpanya D 2021 (142) | Predicting mortality and hospitalization in heart failure using machine learning: A systematic literature review. | MEDLINE, Google Scholar, Springer Link, Scopus, and Web of Science | 30 | NA | predict | 71 | 716,790 | all-cause mortality, 30-day all-cause readmission, cardiac death, heart transplantation and HF-related hospitalization, one year survival | none stated |
| 138 | Mughal H 2022 (143) | Parkinson’s Disease Management via Wearable Sensors: A Systematic Review | IEEE Xplore, Multidisciplinary Digital Publishing Institute  (MDPI), Springer, Elsevier, and other Journals | 60 | NA | Categorize | 4 | 2,063 | Wearable data | none stated |
| 139 | Musa N 2022 (144) | A systematic review and Meta-data analysis on the applications of Deep Learning in Electrocardiogram | IEEE Xplore digital library, ACM  digital library, Science Direct, Springer Links, DBLP,  PubMed,  Scopus and Web of Science | 150 | Kitchenham 2007 (334) | categorize | 16 | 2,322,513 | ECG | Kitchenham 2007 (334) |
| 140 | Musulin J 2021 (145) | Application of Artificial Intelligence-Based Regression Methods in the Problem of COVID-19 Spread Prediction: A Systematic Review. | Google scholar, The Multidisciplinary Preprint Platform, PubMed, Web of Science, Arxiv, and MedArxiv | 127 | All articles were evaluated according to regression measures used for evaluation of AI-based regressors (R2-score, Accuracy, MAE, RMSE). | predict | NA | NA | new cases of COVID19 | none stated |
| 141 | Nadarajah R 2021 (146) | Prediction of incident atrial fibrillation in community-based electronic health records: a systematic review with meta-analysis." | Medline and Embase | 11 | PROBAST | predict | 921 | 95,607 | number of incident atrial fibrillation | none stated |
| 142 | Naemi A 2021 (147) | Machine learning techniques for mortality prediction in emergency departments: a systematic review. | Medline (PubMed), Scopus and Embase (Ovid) | 15 | PROBAST | predict | 100 | 799,522 | vital signs: diastolic blood pressure, heart rate, pulse rate, respiratory rate;, systolic blood pressure, oxygen saturation, body temperature. | none stated |
| 143 | Nafea MS 2022 (148) | Supervised Machine Learning and Deep Learning Techniques for Epileptic Seizure Recognition Using EEG Signals - A Systematic Literature Review | Web of Science and Scopus | 91 | NA | Predict categorize discover | NA | NA | ECG | PRISMA |
| 144 | Nasser M 2023 (149) | Deep Learning Based Methods for Breast Cancer Diagnosis: A Systematic Review and Future Direction | Scopus,  Google Scholar, IEEE Xplore Library,Web of Science, SpringerLink, ScienceDirect, ACM  Digital Library and PubMed | 98 | NA | predict | 106 | 11,429 | Imaging | PRISMA |
| 145 | Nazarian S 2021 (150) | Diagnostic Accuracy of Artificial Intelligence and Computer-Aided Diagnosis for the Detection and Characterization of Colorectal Polyps: Systematic Review and Meta-analysis. | Embase, MEDLINE, and the Cochrane Library | 48 | QUADAS-2 | categorize | 15 | 12,895 | narrow band imaging, endoscopy | none stated |
| 146 | Nguyen A 2018 (151) | Machine learning applications for the differentiation of primary central nervous system lymphoma from glioblastoma on imaging: a systematic review and meta-analysis | PubMed | 8 | QUADAS-2 | categorize | 10 (GBM), 8 (PCNSL) | 70 (GBM), 54 (PCNSL) | Imaging (MRI, FLAIR) prior to treatment | PRISMA |
| 147 | Ogink P 2021a (152) | The use of machine learning prediction models in spinal surgical outcome: An overview of current development and external validation studies. | PubMed, Embase, and Cochrane Library | 59, 77 models | MINORS | predict | 635 | 26,364 | Medical management, Survival, Complication, PROMs, Intraoperative complication | none stated |
| 148 | Ogink P 2021b (153) | Wide range of applications for machine-learning prediction models in orthopedic surgical outcome: a systematic review. | Cochrane library, Embase and PubMed | 33 | NA | predict | 176 | 1,104,233 | cost, complication, survival, readmission, non-home discharge, sustained opioid use | none stated |
| 149 | Ortiz-Barrios M 2021 (154) | Process Improvement Approaches for Increasing the Response of Emergency Departments against the COVID-19 Pandemic: A Systematic Review. | ISI Web of Science, Scopus, PubMed, IEEE, Google Scholar, and Science Direct | 65 | EPOC | discover | 10 | 192,779 | mean length of stay, left-without-being-seen rate, average flow time  Median time to ED revisit  Median waiting time for consultation |  |
| 150 | Ossai C 2021 (155) | Intelligent decision support with machine learning for efficient management of mechanical ventilation in the intensive care unit – A critical overview. | EBSCO, IEEEXplore, Google Scholar, SCOPUS, and the Web of Science | 26 | Joanna Briggs Institute (JBI) critical appraisal checklist for cross-sectional research adapted to machine learning (ML) decision support strategies for effective management | discover | 15 | 3,602 | Tidal Volume (TV), asynchrony, weaning, risk of Prolonged Mechanical ventilation (PMV) | none stated |
| 151 | Paganelli AI 2022 (156) | Real-time data analysis in health monitoring systems: A comprehensive systematic literature review | ACM digital library,  IEEE Xplore, Science Direct, SpringerLink, and PubMed | 36 | NA | categorize | NA | NA | ECG | Kitchenham 2009 (333) |
| 152 | Pahwa B 2021 (157) | Applications of Machine Learning in Pediatric Hydrocephalus: A Systematic Review. | PubMed and Cochrane | 15 | TRIPOD | predict categorize | 9 | 953 | clinical features, CT, MRI, ultrasound |  |
| 153 | Patil S 2019 (158) | Machine learning and its potential applications to the genomic study of head and neck cancer—A systematic review | PubMed, EMBASE, Scopus, Web of Science, grey literature (google scholar, proquest, OpenGrey). | 7 | Newcastle-Ottawa Scale (NOS) | predict | 21 | 408 | Biomarkers, genomic data, clinical data | PRISMA |
| 154 | Peralta M 2021 (159) | Machine learning in deep brain stimulation: A systematic review | PubMed, Google Scholar | 73 | NA | discover | 1 | 509 | micro-electrodes Imaging, Local Field Potential Ext. sensors Clinical EEG/ECoG Stimulation Transcranial Magnetic Stimulation | none stated |
| 155 | Persad E 2021 (160) | Neonatal sepsis prediction through clinical decision support algorithms: A systematic review. | PubMed, CENTRAL and EMBASE | 36 | Risk of bias was assessed with a tool relevant for each study design | predict | 24 | 2,989 | electronic health records; events of apneas, with bradycardia and desaturation; average heart rate characteristics; blood pressure; body temperature; diastolic blood pressure; heart rate; Neonatal Therapeutic Intervention Scoring System; respiratory rate; Score for Acute Neonatal Physiology; oxygen saturation | none stated |
| 156 | Popa S 2021 (161) | Non-Alcoholic Fatty Liver Disease: Implementing Complete Automated Diagnosis and Staging. A Systematic Review. | PubMed, EMBASE, Cochrane Library, and WILEY | 37 | NA | categorize | 18 | 108,139 | ultrasound images | none stated |
| 157 | Prasoppokakorn T 2021 (162) | Application of artificial intelligence for diagnosis of pancreatic ductal adenocarcinoma by EUS: A systematic review and meta-analysis." | Ovid MEDLINE, EMBASE, SCOPUS, International Scientific Indexing, Computer Sciences and Engineering databases including Institute of Electrical and Electronics Engineers and Association for Computing Machinery | 8 | QUADAS-2 | categorize | 20 | 388 | EUS images | none stated |
| 158 | Quaak M 2021 (163) | Deep learning applications for the classification of psychiatric disorders using neuroimaging data: Systematic review and meta-analysis. | PUBMED and IEEE Xplore | 44 | NA | categorize | 4 | 1,301 | f-MRI, s-MRI, Autism Brain Imaging Data Exchange | none stated |
| 159 | Quartuccio N 2021 (164) | The role of PET radiomic features in prostate cancer: a systematic review. | PubMed/MEDLINE | 7 | QUADAS-2 | predict | 52 | 94 | PET | none stated |
| 160 | Ramesh S 2021 (165) | Applications of Artificial Intelligence in Pediatric Oncology: A Systematic Review | Embase, Scopus, and MEDLINE | 42 | NA | predict discover | 12 | 337 | MRI, magnetic resonance imaging; MRS, magnetic resonance spectroscopy, clinical data, histology, Raman histology, CT, computed tomography; FTIR, Fourier-transform infrared spectroscopy; K | none stated |
| 161 | Ramos-Lima L 2020 (166) | The use of machine learning techniques in trauma-related disorders: a systematic review | PubMed, Embase, Web of Science | 49 | Proposed by the authors | predict categorize | 16 (prognositic), 40 (classification), 69 (clustering analysis) | 89,840 (prognositic), 2,782 (classification), 2,782 (network analysis) | imaging, surveys, lab tests, medical records, clinical tests, . | PRISMA |
| 162 | Ravegnini G 2021 (167) | Radiomics and Artificial Intelligence in Uterine Sarcomas: A Systematic Review | PubMed, Scopus, and Cochrane Library | 6 | QUADAS-2 | predict | 58 | 80 | imaging | PRISMA |
| 163 | Ren M 2021 (168) | Artificial intelligence in orthopedic implant model classification: a systematic review | PubMed, EMBASE, and the Cochrane Library | 11 | ad hoc for paper | categorize | 170 | 2,894 | imaging | PRISMA |
| 164 | Rice P 2021 (169) | Machine Learning Models for Predicting Stone-Free Status after Shockwave Lithotripsy: A Systematic Review and Meta-Analysis | MEDLINE, EMBASE, Scopus, ScienceDirect, CINAHL and Cochrane Library + grey literature | 8 | QUADAS-2 | predict | 51 | 984 | NA | PRISMA |
| 165 | Rowe T 2021 (170) | Machine learning for the life-time risk prediction of Alzheimer's disease: a systematic review | Scopus, PubMed and Google Scholar | 12 | NA | predict | NA | NA | NA | CHARMS |
| 166 | Safaei M 2021 (171) | A systematic literature review on obesity: Understanding the causes & consequences of obesity and reviewing various machine learning approaches used to predict obesity | Science Direct, Springer Link, IEEE Explorer, Taylor and Francis Online, ACM Digital Library, MDPI, NCBI | 93 | Nidhra et al | predict | NA | NA | NA | Kitchenham and Charters + Jula |
| 167 | Sajjadian M 2021 (172) | Machine learning in the prediction of depression treatment outcomes: a systematic review and meta-analysis | PubMed, Google Scholar, ScienceDirect, and PsychINFO | 54 but only 8 adequate-quality papers | ad hoc for paper | predict | NA | NA | NA | PRISMA |
| 168 | Salas-Zárate R 2022 (173) | Detecting Depression Signs on Social Media: A Systematic Literature Review | ACM Digital  Library, IEEE Xplore Digital Library, SpringerLink, Science Direct, and PubMed, Google Scholar | 34 | NA | discover | NA | NA | Social media | Brereton 2007 (335) |
| 169 | Salem H 2021 (174) | A systematic review of the applications of Expert Systems (ES) and machine learning (ML) in clinical urology | WEB OF SCIENCE, EMBASE, BIOSIS CITATION INDEX, SCOPUS, PUBMED, Google Scholar and MEDLINE | 138 | NA | predict discover | NA | NA | NA | PRISMA |
| 170 | Sanmarchi F 2023 (175, 176) | Predict, diagnose, and treat chronic kidney disease with machine learning: a systematic literature review | PubMed | 68 | PROBAST and Luo et al. (336) | Predict discover categorize | 30 | 550,000 | Lab data | PRISMA |
| 171 | Saputro S 2021 (177) | Prognostic models of diabetic microvascular complications: a systematic review and meta analysis | PubMed and Scopus | 76 | PROBAST | predict | NA | NA | age, sex, HbA&c, eGFR, BMI, SBP, diabetic duration | PRISMA + CHARMS |
| 172 | Sardar SK 2022 (178) | A Systematic Literature Review on Machine Learning Algorithms for Human Status Detection | ScienceDirect, IEEE Xplore, ACM | 76 | NA | categorize | NA | NA | Physiological data | PRISMA |
| 173 | Scardoni A 2020 (179) | Artificial intelligence-based tools to control healthcare associated infections: A systematic review of the literature | Medline, Embase | 27 | Newcastle-Ottawa Scale (NOS) for non-randomized, Cochrane tool for randomized. | categorize | 100 | 191,014 | clinical data, lab tests | PRISMA |
| 174 | Segato A 2020 (180) | Artificial intelligence for brain diseases: A systematic review | PubMed, Scopus, Web of Science | 154 | NA | categorize | 5 | 1,576 | Imaging (MRI, PET, CT, ultrasound, HSI), Connectivity, Clinical recordings (EEG, microelectrode), EHR, gene sequencing | PRISMA |
| 175 | Senanayake S 2019 (181) | Machine learning in predicting graft failure following kidney transplantation: A systematic review of published predictive models | Medline, CINAHL, EMBASE, PsycINFO, Cochrane databases | 18 | Qiao 2019 | predict | NA | NA | Transplant records, patient registries, lab tests | PRISMA |
| 176 | Senders J 2018 (182) | Natural and Artificial Intelligence in Neurosurgery: A Systematic Review | PubMed, Embase | 23 | NA | categorize | Diagnosis (10); Pre-op planning (9), outcomes (101) | Diagnosis (3,785 + 1,225); Pre-op planning (523), outcomes (7,769) | imaging, EEG, EHR, genetics and clinical data, | PRISMA |
| 177 | Shi Z 2021 (183) | Methodological quality of machine learning‑based quantitative imaging analysis studies in esophageal cancer: a systematic review of clinical outcome prediction after concurrent chemoradiotherapy | PubMed and Embase Ovid | 37 | RQS + findings of other radiomics methodological evaluations | predict | 11 | 190 | Imaging | PRISMA |
| 178 | Shillan D 2019 (184) | Use of machine learning to analyse routinely collected intensive care unit data a systematic review | PubMed, Web of Science | 258 | NA | predict | median sample size across all studies was 488 (IQR 108–4,099) |  | Patient-reported outcomes | PRISMA |
| 179 | Shin S 2021 (185) | Machine learning vs. conventional statistical models for predicting heart failure readmission and mortality | MEDLINE, EPUB, Cochrane CENTRAL, EMBASE, INSPEC, ACM, and Web of Science | 20 | CHARMS | predict | NA | NA | NA | PRISMA |
| 180 | Shlobin N 2021 (186) | Artificial Intelligence for Large-Vessel Occlusion Stroke: A Systematic Review | PubMed MEDLINE (National Library of Medicine), Embase (Elsevier), and Scopus (Elsevier) | 40 | GRADE + PROBAST | predict discover | NA | NA | NA | PRISMA |
| 181 | Siddiqui S 2022 (187) | Deep Learning Models for the Diagnosis and Screening of COVID-19: A Systematic Review | Google Scholar, PubMed, IEEE | 45 | Zeng 2015 (337) | Predict discover | 147 | 80,000 | Imaging | Kable 2012 (338) |
| 182 | Smets J 2021 (188) | Machine Learning Solutions for Osteoporosis—A Review | PubMed and Web of Science | 89 | NA | predict discover | NA | NA | NA | PRISMA |
| 183 | Soffer S 2021 (189) | Deep learning for pulmonary embolism detection on computed tomography pulmonary angiogram: a systematic review and meta‑analysis | Medline, pubmed | 5 | QUADAS-2 | categorize | 121 | 29,465 | images | PRISMA |
| 184 | Song D 2021 (190) | Machine learning with neuroimaging data to identify autism spectrum disorder: a systematic review and meta‑analysis | PubMed, Scopus, and Embase | 44 | QUADAS-2 | categorize | NA | NA | MRI images | PRISMA |
| 185 | Song X 2021 (191) | Comparison of machine learning and logistic regression models in predicting acute kidney injury: A systematic review and meta-analysis | Pubmed, Embase | 24 | NA | predict | 27 | 1,620,898 | surgery, admission, hospitalization, transplant, cancer, care | PRISMA |
| 186 | Sorin V 2020 (192) | Deep Learning for Natural Language Processing in Radiology — Fundamentals and a Systematic Review | Medline, Scopus, Google Scholar | 10 | NA | categorize | NA | NA | Patient journals, clinical reports, imaging | PRISMA |
| 187 | Srivani M 2022 (193) | Cognitive computing technological trends and future research directions in healthcare — A systematic literature review | Scopus, IEEEXplore, Google Scholar, DBLP, PubMed, Springer, Science Direct | 10 | NA | categorize | NA | NA | HER, genomic, sensors, eye images | Non stated |
| 188 | Stephens M 2022 (194) | Utility of machine learning algorithms in degenerative cervical and lumbar spine disease: a systematic review | PubMed, Embase, Medline, and Cochrane | 35 | GRADE + PROBAS | predict discover | NA | NA | NA | PRISMA |
| 189 | Stewart J 2021 (195) | Applications of machine learning to undifferentiated chest pain in the emergency department: A systematic review | PubMed (MEDLINE), Cochrane Library, Web of Science, Embase, and Scopus | 23 | NA | predict categorize | 228 | 85,254 | demographics, PMHx, Sx, Exam, ECG, Meds, Vitals, troponins, labs, estrogen status (women), echo | PRISMA |
| 190 | Stokes K 2022 (196) | The use of artificial intelligence systems in diagnosis of pneumonia via signs and symptoms: A systematic review | PubMed, Scopus, and OvidSP | 16 | STARD 2015 tool | predict | 249 | 48,449 | Imaging | PRISMA |
| 191 | Subramanian H 2021 (197) | Trends in Development of Novel Machine Learning Methods for the Identification of Gliomas in Datasets That Include Non-Glioma Images: A Systematic Review | Ovid Embase, Ovid MEDLINE, Cochrane trials (CENTRAL), and Web of Science-Core Collection | 12 | TRIPOD | predict categorize | 42 patients (but many studies unspecified) | 717 | Images | PRISMA |
| 192 | Syeda H 2021 (198) | Role of Machine Learning Techniques to Tackle the COVID-19 Crisis: Systematic Review | PubMed, Web of Science, and the CINAHL databases | 130 | NA | predict categorize | 5 | 6,054 | imagining (MRI, Radiograph, CT), social media posts, lab tests | PRISMA |
| 193 | Syer T 2021 (199) | Artificial Intelligence Compared to Radiologists for the Initial Diagnosis of Prostate Cancer on Magnetic Resonance Imaging: A Systematic Review and Recommendations for Future Studies | MEDLINE, EMBASE, and arXiv electronic databases, and the OpenSIGLE repository | 27 | QUADAS-2 | categorize | NA | NA | Images | PRISMA |
| 194 | Tabatabaei M 2021 (200) | Current Status and Quality of Machine Learning-Based Radiomics Studies for Glioma Grading: A Systematic Review | PubMed, Scopus, and EMBASE | 18 | NA | predict discover | NA | NA | Images | PRISMA |
| 195 | Tan K 2021 (201) | Evaluation of Machine Learning Methods Developed for Prediction of Diabetes Complications: A Systematic Review | MEDLINE® (via PubMed®), Embase®, the Cochrane® Library, Web of Science®, and DBLP Computer Science Bibliography | 32 | PROBAST | predict discover | 52 | 805,867 | NA | PRISMA + CHARMS |
| 196 | Teo Y 2021 (202) | Predicting Clinical Outcomes in Acute Ischemic Stroke Patients Undergoing Endovascular Thrombectomy with Machine Learning | Pubmed | 4 | NA | predict | 50 | 387 | NA | PRISMA |
| 197 | Tewarie I 2021 (203) | Survival prediction of glioblastoma patients—are we there yet? A systematic review of prognostic modeling for glioblastoma and its clinical potential | Embase, Medline Ovid (PubMed), Web of science, Cochrane CENTRAL, and Google Scholar | 27 | PROBAST and CHARMS | predict | NA | NA | clinical parameters, genomics, MRI imaging, combined clinical and genomics, combined clinical and MRI imaging, combined clinical, MRI imaging and genomics, histopathology, combined clinical and pharmacokinetics | PRISMA |
| 198 | Triantafyllidis A 2020 (204) | Computerized decision support and machine learning applications for the prevention and treatment of childhood obesity: A systematic review of the literature | PubMed and Scopus | 9 | NA | predict categorize | NA | NA | patients questionnaires | PRISMA |
| 199 | Ugga L 2021 (205) | Meningioma MRI radiomics and machine learning: systematic review, quality score assessment, and meta-analysis | PubMed, Scopus, and Web of Science | 8 | RQS and QUADAS-2 | discover | NA | NA | NA | PRISMA-DTA |
| 200 | van Kempen E 2021a (206) | Accuracy of Machine Learning Algorithms for the Classification of Molecular Features of Gliomas on MRI: A Systematic Literature Review and Meta-Analysis | Medline (accessed through PubMed), EMBASE, and the Cochrane Library | 17 | TRIPOD | categorize | 23 | 381 | Images | PRISMA |
| 201 | van Kempen E 2021b (207) | Performance of machine learning algorithms for glioma segmentation of brain MRI: a systematic literature review and meta-analysis | Medline (accessed through PubMed), EMBASE, and the Cochrane Library | 8 | TRIPOD | predict discover | 11 | 287 | Images | PRISMA |
| 202 | Volpe S 2021 (208) | Machine Learning for Head and Neck Cancer: A Safe Bet?—A Clinically Oriented Systematic Review for the Radiation Oncologist | National Center for Biotechnology Information PubMed, Elsevier EMBASE and Elsevier Scopus | 48 | internal qualitative checklist | predict discover | NA | NA | NA | PRISMA |
| 203 | Wang W 2020 (209) | A systematic review of ML models for predicting outcomes of stroke with structured data | PubMed, Web of Science | 18 | TRIPOD | predict | 70 | 3,184 | NA | PRISMA |
| 204 | Wesselius F 2021 (210) | Digital biomarkers and algorithms for detection of atrial fibrillation using surface electrocardiograms: A systematic review | pubmed | 130 | NA | categorize discover | NA | NA | NA | PRISMA |
| 205 | Wongkoblap A 2017 (211) | Researching Mental Health Disorders in the Era of Social Media: Systematic Review | PubMed, IEEE , ACM Digital LibrarY, Web of Science, and Scopus | 48 | NA | categorize | NA | NA | patients reported outcomes | none stated |
| 206 | Wu J 2021 (212) | Performance and Limitation of Machine Learning Algorithms for Diabetic Retinopathy Screening: Meta-analysis | PubMed and EMBASE | 60 | QUADAS-2 | categorize discover | NA | NA | NA | PRISMA |
| 207 | Xu L 2021 (213) | Prognostic models for amyotrophic lateral sclerosis: a systematic review | Medline, Embase, Web of Science, and Cochrane library | 28 | PROBAST | predict | NA | NA | NA | PRISMA |
| 208 | Yan M 2022 (214) | Sepsis prediction, early detection, and identification using clinical text for machine learning: a systematic review | PubMed and Scopus, ACM DL, dblp, and IEEE Xplore | 9 | NA | predict categorize discover | NA | NA | NA | PRISMA |
| 209 | Yeo M 2021 (215) | Review of deep learning algorithms for the automatic detection of intracranial hemorrhages on computed tomography head imaging | MEDLINE and arXiv databases | 11 | NA | Categorize | 246 | 313,318 | Images | PRISMA |
| 210 | Yin J 2021 (216) | Role of Artificial Intelligence Applications in Real-Life Clinical Practice: Systematic Review | PubMed, Embase, Cochrane Central, and CINAHL | 51 | NA | Discover | NA | NA | NA | PRISMA |
| 211 | Yu K 2020 (217) | Machine Learning Applications in the Evaluation and Management of Psoriasis: A Systematic Review | MEDLINE, Google Scholar, ACM Digital Library, IEEE Xplore | 33 | NA | predict categorize | NA | NA | imaging, lab tests, clinical data, patient journals, literature databases, registries | PRISMA |
| 212 | Zakhem G 2020 (218) | Characterizing the role of dermatologists in developing artificial intelligence for assessment of skin cancer: A systematic review | PubMed | 51 | NA | Categorize | NA | NA | Imaging | none stated |
| 213 | Zaunseder E 2022 (219) | Opportunities and challenges in machine learning-based newborn screening-A systematic literature review | ScienceDirect, IEEE, ACM, Sage, and PubMed | 17 | NA | categorize | NA | NA | Physiological data | PRISMA |
| 214 | Zeiser F 2021 (220) | Breast cancer intelligent analysis of histopathological data: A systematic review | ACM Digital Library, IEEE Xplore Library, PubMed, Google Scholar, ScienceDirect, Scopus, SpringerLink, and Web of Science | 53 | h5-index, SJR-index, CORE-index | Discover | 58 | 8,158 | Images | PRISMA |
| 215 | Zhang L 2021 (221) | Development of artificial intelligence in epicardial and pericoronary adipose tissue imaging: a systematic review | PubMed and the Web of Science | 19 | NA | predict discover | NA | NA | Images | PRISMA |
| 216 | Zhao Y 2021 (222) | Social Determinants in Machine Learning Cardiovascular Disease Prediction Models: A Systematic Review | PubMed, Embase, Web of Science, IEEE Xplore, and ACM Digital Library | 48 | NA | Predict | NA | NA | not reported | PRISMA |
| 217 | Zheng Q 2021 (223) | Artificial intelligence performance in detecting tumor metastasis from medical radiology imaging: A systematic review and meta-analysis | PubMed andWeb of Science | 34 | NA | categorize discover | NA | NA | Images | PRISMA |
| 218 | Zheng Y 2022 (224) | Identifying Patients With Hypoglycemia Using Natural Language Processing: Systematic Literature Review | PubMed, Web of Science Core Collection, CINAHL (EBSCO),  PsycINFO (Ovid), IEEE Xplore, Google Scholar, and ACL Anthology | 8 | NA | discover | NA | NA | Physiological data | NA |
| 219 | Zhou Y 2022 (225) | Machine learning predictive models for acute pancreatitis: A systematic review | PubMed, Web of Science, Scopus, and Embase | 24 | NA | Predict | NA | NA | Images | PRISMA |
| 220 | Zhu T 2020 (226) | Deep Learning for Diabetes: A Systematic Review | PubMed, DBLP Computer Science Bibliography, and IEEEXplore | 40 | NA | categorize discover | 37 | 199,116 | imaging, EHR, lab tests (no details provided) |  |
|  | **TOTAL** |  |  | **10,963** |  |  |  |  |  |  |

**Table 2.** Review of sources of data used across included studies.

| **Chapter of ICD-10** | **Name of ICD-10 chapter** | **No of SLRs** | **Sources of data used** | | | | | |
| --- | --- | --- | --- | --- | --- | --- | --- | --- |
| **Imaging** | **Laboratory, testing** | **Clinical notes** | **Patient-reported data** | **Epidemiology & demographics** | **Other (mobile applications, genetic data etc.)** |
| I | Certain infectious and parasitic diseases | 9 | 3 | 2 | 2 | 1 | 4 |  |
| II | Neoplasms | 44 | 37 | 5 | 8 | 3 | 3 | mobile applications, genetic data etc. |
| III | Diseases of the blood and blood-forming organs and certain disorders involving the immune mechanism | 2 |  | 1 | 1 |  | 1 |  |
| IV | Endocrine, nutritional and metabolic diseases | 7 | 2 | 4 | 2 | 1 | 3 | mobile applications |
| V | Mental and behavioral disorders | 11 | 5 | 1 | 2 | 1 | 2 | genetic data, voice data, text data, checklists and questionnaires, bio signals, social media |
| VI | Diseases of the nervous system | 30 | 14 | 8 | 9 | 8 | 3 | mobile applications, genetic data, wearable data |
| VII | Diseases of the eye and adnexa | 3 | 3 |  |  |  |  |  |
| VIII | Diseases of the ear and mastoid process | 1 |  |  |  |  |  |  |
| IX | Diseases of the circulatory system | 18 | 5 | 2 | 2 | 1 | 2 | mobile applications, genetic data, sound recording, wearable data, ECG |
| X | Diseases of the respiratory system | 21 | 12 | 5 | 7 | 3 | 5 | mobile applications, genetic data |
| XI | Diseases of the digestive system | 10 | 9 | 3 | 2 | 2 |  |  |
| XII | Diseases of the skin and subcutaneous tissue | 4 | 2 | 1 | 1 | 2 |  |  |
| XIII | Diseases of the musculoskeletal system and connective tissue | 15 | 8 | 4 | 6 | 5 | 1 | mobile applications, genetic data, muscle measurements |
| XIV | Diseases of the genitourinary system | 5 | 1 | 2 |  | 1 |  |  |
| XV | Pregnancy, childbirth and the puerperium | 6 | 1 | 1 | 2 | 2 |  |  |
| XVIII | Symptoms, signs and abnormal clinical and laboratory findings, not elsewhere classified | 2 |  | 1 |  |  | 1 |  |
| XIX | Injury, poisoning and certain other consequences of external causes | 0 | 3 | 3 | 4 | 4 |  |  |
| XXI | Factors influencing health status and contact with health services | 19 | 7 | 5 | 5 | 8 | 3 | genetic data etc. |
|  | **Total** | 214 * | 112 | 48 | 53 | 42 | 28 |  |
| *Boonstra 2022: emergency (whatever condition); Hoekstra 2022 (77): medical events (whatever condition); Kennedy 2021 (98): acute care discharge (whatever condition); Kim 2022 (100): adverse event reactions (whatever condition or drug); Paganelli 2022 (156): just health monitoring and Sardar 2022 (178): “Human Status Detection” (emotions) NOT COUNTED HERE | | | | | | | | |

**Table 3.** Number of studies included in reviewed SLRs that reported accuracy, sensitivity and specificity.

| **N** | **Author and Year** | **No of studies** | **No of studies that reported** | | |
| --- | --- | --- | --- | --- | --- |
| **Accuracy** | **Sensitivity** | **Specificity** |
| 1 | Abu Bakar 2021 (6) | 11 | 10 | NA | NA |
| 2 | Adamidi E 2021 (7) | 101 | 48 | 51 | 47 |
| 3 | Adeoye J 2021 (8) | 27 | 19 | 19 | 19 |
| 4 | Akazawa M 2021 (10) | 71 | 41 | 25 | 23 |
| 5 | Al Hinai G 2021 (11) | 12 | 10 | 11 | 11 |
| 6 | Alabi R 2021 (12) | 41 | 28 | 23 | 26 |
| 7 | Albahri A 2020 (13) | 8 | 6 | 0 | 0 |
| 8 | Alballa N 2021 (14) | 52 | 11 | 23 | 22 |
| 9 | Alharbi B 2022 (15) | 15 | 8 | 3 | 3 |
| 10 | Alhasan M 2021 (16) | 20 | 20 | 5 | 5 |
| 11 | Alsolai H (17) | 27 | 27 | N/A | N/A |
| 12 | Anteby R 2021 (18) | 16 | 8 | NA | NA |
| 13 | Bang CS 2021a (19) | 33 | 33 | 33 | 33 |
| 14 | Bang CS 2021b (20) | 21 | 21 | 21 | 21 |
| 15 | Bazoukis G 2021 (22) | 122 | 48 | 35 | 31 |
| 16 | Bedrikovetski S 2021a (23) | 17 | 11 | 9 | 9 |
| 17 | Bedrikovetski S 2021b (24) | 17 | 11 | 10 | 10 |
| 18 | Benoit J 2020 (25) | 16 | 7 | 7 | 8 |
| 19 | Bernert RA 2020 (26) | 87 | 54 | 52 | 50 |
| 20 | Binvignat M 2022 (28) | 46 | N/A | N/A | N/A |
| 21 | Boyd C 2021 (30) | 47 | 29 | 22 | 15 |
| 22 | Bracher-Smith M 2021 (31) | 13 | 7 | 5 | 5 |
| 23 | Buchlak Q 2020 (32) | 70 | NA | NA | NA |
| 24 | Buisson M 2021 (33) | 6 | 3 | 2 | 2 |
| 25 | Cabitza F 2018 (34) | 70 | 70 | 70 | 70 |
| 26 | Castaldo R 2021 (35) | 29 | NA | 7 | 7 |
| 27 | Cavus N 2021 (36) | 22 | NA | NA | NA |
| 28 | Celtikci E 2018 (37) | 51 | 1 | 4 | 4 |
| 29 | Chee M 2021 (39) | 14 | 11 | 0 | 0 |
| 30 | Chiesa-Estomba C 2021 (40) | 8 | 0 | 8 | 0 |
| 31 | Cho S 2021 (41) | 12 | 3 | 3 | 3 |
| 32 | Choudhury A 2020a (42) | 35 | 25 | 19 | 16 |
| 33 | Choudhury A 2020b (43) | 35 | 21 | 23 | 14 |
| 34 | da Silva Neto S 2022 (44) | 15 | 11 | NA | NA |
| 35 | Dallora A 2017 (45) | 37 | NA | NA | NA |
| 36 | Dallora A 2019 (46) | 26 | 4 | 0 | 0 |
| 37 | Daniel 2023 (49) | 39 | 17 | 6 | N/A |
| 38 | D'Antoni F 2021 (48) | 76 | 76 | NA | NA |
| 39 | Das PK 2022 (49) | 29 | 29 | 24 | 23 |
| 40 | de Bardeci M 2021 (51) | 30 | 29 | 30 | 30 |
| 41 | Decharatanachart P 2021 (52) | 19 | 19 | 19 | 19 |
| 42 | DelSole E 2021 (54) | 44 | 14 | 9 | 8 |
| 43 | Dogan O 2021 (55) | 264 | 127 | 177 | 166 |
| 44 | Dudchenko A 2020 (56) | 27 | 14 | 9 | 9 |
| 45 | Ebrahimighahnavieh A 2020 (58) | 114 | 43 | 0 | 0 |
| 46 | El-Daw S 2021 (59) | 8 | 4 | 7 | 6 |
| 47 | Falconer N 2021 (60) | 8 | 7 | 5 | 5 |
| 48 | Farook T 2021 (61) | 34 | 21 | 16 | 12 |
| 49 | Fernandes F 2021 (62) | 18 | 9 | 9 | 7 |
| 50 | Fregoso-Aparicio L 2021 (63) | 90 | 63 | NA | 23 |
| 51 | Frondelius T 2022 (64) | 20 | 20 | NA | NA |
| 52 | Fusco R 2021 (65) | 23 | 16 | 11 | 10 |
| 53 | Garrow C 2021 (66) | 35 | 23 | 18 | 15 |
| 54 | Ghaderzadeh M 2019 (67) | 37 | 35 | 0 | 0 |
| 55 | Gutiérrez-Tobal G 2021 (69) | 19 | 17 | NA | NA |
| 56 | Hasan N 2021 (72) | 51 | 38 | NA | NA |
| 57 | Hassan N 2021 (73) | 17 | 16 | NA | NA |
| 58 | Henn J 2021 (74) | 47 | 42 | NA | NA |
| 59 | Hickman S 2021 (75) | 14 | 12 | NA | NA |
| 60 | Hinterwimmer F 2021 (76) | 19 | 14 | 9 | 6 |
| 61 | Hoekstra O 2022 (77) | 35 | 9 | 17 | 8 |
| 62 | Hoodbhoy Z 2021 (78) | 363 | 272 | NA | NA |
| 63 | Hosni M 2019 (79) | 193 | 185 | NA | NA |
| 64 | Hoyos W 2021 (80) | 64 | 58 | NA | NA |
| 65 | Huang J 2021 (81) | 35 | 29 | NA | NA |
| 66 | Huang S 2021 (82) | 30 | 24 | NA | NA |
| 67 | Huang Z 2021 (83) | 28 | 27 | NA | NA |
| 68 | Ibrahim B 2021 (84) | 36 | 34 | NA | NA |
| 69 | Infante T 2021 (85) | 60 | 53 | NA | NA |
| 70 | Irgang L 2023 (86) | 59 | N/A | N/A | N/A |
| 71 | Islam MN 2022 (87) | 26 | N/A | N/A | N/A |
| 72 | Jiang M 2021 (89) | 32 | 11 | NA | NA |
| 73 | Kalhori SR 2021 (91) | 62 | 56 | NA | NA |
| 74 | Kausch S 2021 (95) | 14 | 14 | 14 | 14 |
| 75 | Kawamoto A 2022 (96) | 27 | 8 | 3 | 2 |
| 76 | Kedra J 2019 (97) | 110 | 58 | 39 | 32 |
| 77 | Kennedy EE 2022 (98) | 28 | 3 | 8 | 10 |
| 78 | Kim HR 2022 (339) | 72 | N/A | N/A | N/A |
| 79 | Kim S 2021 (101) | 17 | 16 | NA | NA |
| 80 | Kodama S 2021 (102) | 33 | 30 | NA | NA |
| 81 | Komolafe T 2021 (103) | 19 | NA | 16 | 15 |
| 82 | Kozikowski M 2021 (105) | 8 | 5 | NA | NA |
| 83 | Kumar S 2021 (106) | 64 | 36 | NA | NA |
| 84 | Kumar Y 2021 (107) | 185 | 94 | 135 | 130 |
| 85 | Le Glaz A 2021 (111) | 58 | 24 | NA | NA |
| 86 | Lecointre L 2021 (112) | 17 | 3 | NA | NA |
| 87 | Lequertier V 2021 (113) | 74 | 67 | NA | NA |
| 88 | Li M 2021 (115) | 252 | 239 | NA | NA |
| 89 | Li Y 2021 (116) | 22 | 18 | 16 | 15 |
| 90 | Librenza-Garcia D 2017 (117) | 51 | 48 | NA | NA |
| 91 | Lima CLD 2022 (118) | 139 | N/A | N/A | N/A |
| 92 | Locquet M 2021 (119) | 13 | 10 | NA | NA |
| 93 | Lubelski D 2021 (121) | 31 | 22 | NA | NA |
| 94 | Mangold C 2021 (123) | 11 | 9 | 4 | 4 |
| 95 | Mari 2022 (124) | 44 | 42 | 15 | 15 |
| 96 | Matsangidou M 2021 (125) | 26 | 3 | 3 | 3 |
| 97 | Mawdslay E 2021 (126) | 9 | 4 | 6 | 6 |
| 98 | Medic G 2019 (127) | 20 | 17 | 9 | 8 |
| 99 | Mellia J 2021 (129) | 29 | 24 | 13 | 13 |
| 100 | Miltiadous A 2023 (130) | 190 | 120 | 15 | N/A |
| 101 | Minissi M 2021 (131) | 11 | 1 | 0 | 0 |
| 102 | Miranda L 2021 (132) | 20 | 6 | 15 | 12 |
| 103 | Mirzania D 2021 (133) | 29 | 19 | 23 | 22 |
| 104 | Moezzi M 2021 (134) | 36 | 9 | 4 | 2 |
| 105 | Moglia A 2021 (135) | 35 | 23 | 35 | 31 |
| 106 | Mohan B 2021 (136) | 9 | 5 | 1 | 4 |
| 107 | Mondal M 2021 (137) | 52 | 27 | 30 | 33 |
| 108 | Moor M 2021 (139) | 22 | 9 | 2 | 2 |
| 109 | Moshawrab M 2023 (140) | 87 | 69 | 16 | 13 |
| 110 | Moura F 2021 (141) | 46 | 11 | 8 | NA |
| 111 | Musa N 2022 (144) | 150 | 147 | 52 | 70 |
| 112 | Nadarajah R 2021 (146) | 11 | 4 | 6 | 6 |
| 113 | Naemi A 2021 (147) | 15 | 15 | 15 | 15 |
| 114 | Nafea MS 2022 (148) | 91 | 10 | 101 | 9 |
| 115 | Nasser M 2023 (149) | 98 | 42 | 18 | 14 |
| 116 | Nazarian S 2021 (150) | 48 | 42 | 30 | 30 |
| 117 | Ogink P 2021a (152) | 33 | 17 | NA | NA |
| 118 | Ogink P 2021b (153) | 59 | 59 | 59 | 59 |
| 119 | Ortiz-Barrios M 2021 (154) | 65 | 11 | 16 | 15 |
| 120 | Ossai C 2021 (155) | 26 | 20 | 16 | 15 |
| 121 | Paganelli AI 2022 (340) | 36 | 20 | 10 | 10 |
| 122 | Pahwa B 2021 (157) | 15 | 3 | 2 | 3 |
| 123 | Patil S 2019 (158) | 7 | 5 | 0 | 0 |
| 124 | Peralta M 2021 (159) | 73 | 42 | 28 | 19 |
| 125 | Persad E 2021 (160) | 36 | 1 | 10 | 10 |
| 126 | Popa S 2021 (161) | 37 | 5 | 5 | NA |
| 127 | Prasoppokakorn T 2021 (162) | 8 | NA | 8 | 8 |
| 128 | Quaak M 2021 (163) | 44 | 43 | 29 | 29 |
| 129 | Ramesh S 2021 (165) | 42 | 7 | 3 | 3 |
| 130 | Ramos-Lima L 2020 (166) | 49 | 28 | 14 | 14 |
| 131 | Ravegnini G 2021 (167) | 6 | 1 | 1 | 1 |
| 132 | Ren M 2021 (168) | 11 | 9 | NA | NA |
| 133 | Rice P 2021 (169) | 8 | 6 | 8 | 8 |
| 134 | Sajjadian M 2021 (172) | 54 but only 8 adequate-quality papers | 30 | NA | NA |
| 135 | Salas-Zárate R 2022 (173) | 34 | 1 | N/A | N/A |
| 136 | Salem H 2021 (174) | 138 | 69 | NA | NA |
| 137 | Sanmarchi F 2023 (175) | 68 | 30 | 29 | 34 |
| 138 | Sardar SK 2022 (178) | 76 | N/A | N/A | N/A |
| 139 | Scardoni A 2020 (179) | 27 | 10 | 15 | 16 |
| 140 | Segato A 2020 (180) | 154 | 102 | 57 | 54 |
| 141 | Senanayake S 2019 (181) | 18 | 6 | 12 | 10 |
| 142 | Senders J 2018 (182) | 23 | 11 | 7 | 6 |
| 143 | Shillan D 2019 (184) | 258 | 168 | 168 | 168 |
| 144 | Siddiqui S 2022 (187) | 45 | 33 | 21 | 24 |
| 145 | Soffer S 2021 (189) | 5 | NA | 4 | 3 |
| 146 | Song D 2021 (190) | 44 | 12 | 12 | 12 |
| 147 | Sorin V 2020 (192) | 10 | 5 | 1 | 1 |
| 148 | Srivani M 2022 (193) | 10 | 5 | N/A | N/A |
| 149 | Stephens M 2022 (194) | 35 | 9 | 12 | 9 |
| 150 | Stewart J 2021 (195) | 23 | 2 | 7 | 7 |
| 151 | Stokes K 2022 (196) | 16 | 8 | 8 | 7 |
| 152 | Subramanian H 2021 (197) | 12 | 9 | 5 | 5 |
| 153 | Syeda H 2021 (198) | 130 | NA | NA | NA |
| 154 | Syer T 2021 (199) | 27 | NA | 16 | 14 |
| 155 | Tabatabaei M 2021 (200) | 18 | NA | 15 | 10 |
| 156 | Tewarie I 2021 (203) | 27 | 5 | NA | NA |
| 157 | Triantafyllidis A 2020 (204) | 9 | 4 | NA | NA |
| 158 | Ugga L 2021 (205) | 8 | 3 | 1 | 1 |
| 159 | van Kempen E 2021a (206) | 17 | NA | 11 | 11 |
| 160 | van Kempen E 2021b (207) | 17 | 15 | 12 | 12 |
| 161 | Wang W 2020 (209) | 18 | 9 | 8 | 7 |
| 162 | Wongkoblap A 2017 (211) | 48 | NA | NA | NA |
| 163 | Yeo M 2021 (215) | 11 | 5 | 10 | 8 |
| 164 | Yu K 2020 (217) | 33 | 14 | 3 | 2 |
| 165 | Zakhem G 2020 (218) | 51 | NA | NA | NA |
| 166 | Zeiser F 2021 (220) | 53 | 35 | 6 | 4 |
| 167 | Zheng Y 2022 (224) | 8 | N/A | 5 | N/A |
| 168 | Zhu T 2020 (226) | 40 | 12 | 32 | 14 |
|  | **Total** | **7,752** | **4,311** | **2,194** | **1,964** |

**Table 4.** Reviews with comparison of ML vs. clinical experts

| **N** | **Lead author & year**  **(SLRs)** | **How many studies provided methodological approach to comparison** | **Lead author & year (primary study)** | **Clinical experts** | **Total number of clinical experts [N]** | **Number of clinical experts with specialization [n]** | **Experience [years, junior-senior]** | **Other features of expercience** | **Blinded** | **Clinic center** | **Results** |
| --- | --- | --- | --- | --- | --- | --- | --- | --- | --- | --- | --- |
| 1 | Adeoye J 2021 (8) | 2 out of 27 | Ariji Y 2019 (227) | Radiologists | N = 2 | NA | NA | NA | NA | NA | Comparable performance |
| Ariji Y 2020 (228) | Radiologists | N = 4 | NA | > 20 years of experience (n = 1) > 10 years of experience (n = 3) | NA | NA | Single (national) | Superiority of the ML |
| 2 | Al Hinai G 2021 (11) | 2 out of 12 | Kwon JM 2020 (229) | Cardiologists | N = 4 | NA | Over 10 years in clinical practice | Y: Board-certified practicing cardiologists | NA | Single (national) | Superiority of the ML |
| Nakajima K 2017 (230) | Nuclear cardiology experts | N = 8 | Nuclear cardiology experts reconfirmed the appropriateness of the judgment without clinical information (n = 6) experts interpreted the data during this process and modified the judgment with referral to other expert opinions to reach consensus (n = 2). | NA | NA | NA | NA | Comparable performance |
| 3 | Buisson M 2021 (33) | 6 out of 6 | Al-Aswad LA 2019 (231) | Ophthalmologists  Members in training | N = 6 | Glaucoma fellows (n = 2) Glaucoma specialist (n = 1) Neuroophthalmologist (n = 1) Members in training: second-year and third-year resident (n = 2) |  | NA | NA | NA | Superiority of the ML |
| Liu S 2018 (232) | Glaucoma specialists General ophthalmologists | N = 18 | Glaucoma specialists (n = 11) General ophthalmologists (n = 7) | NA | NA | NA | Multi (international) | Superiority of the ML |
| Phene S 2019 (233) | Ophthalmologists Glaucoma specialists | N = 12 glaucoma specialists N = 6 ophthalmologists N = 4 glaucoma specialists  (Validation Dataset A, B, C) | NA | NA | NA | NA | NA | Superiority of the ML |
| Shibata N 2018 (234) | Residents in Ophthalmology | N = 3 | First year in Ophthalmology residency (n = 1) Third year in Ophthalmology residency (n = 1) Fourth year in Ophthalmology residency (n = 1) | NA | NA | NA | NA | Superiority of the ML |
| Seo E 2018 (235) | Glaucoma specialists | N = 2 | NA | NA | NA | NA | NA | Comparable performance |
| Jammal AA 2019 (236) | Glaucoma specialists | N = 2 | NA | NA | NA | NA | NA | Comparable performance |
| 4 | Haggenmuller S 2021 (70) | 19 out of 19 | Brinker TJ 2019 (237) | Dermatologists | N = 157 | NA | Junior physicians (n = 88) Attendings (n = 15) Senior physicians (n = 45) Chief physicians (n = 3) | Y: University hospital (n = 151)  Resident physicians (n = 6) | NA | Multi (national) | Superiority of the ML  (CNN outperformed 136 out of 157 dermatologists) |
| Brinker TJ 2019 (238) | Dermatologists | N = 144 | nie dotyczy | Junior clinicians (n = 92) Board-certified dermatologists (n = 52) | NA | NA | Multi (national) | Superiority of the ML |
| Yu JS 2018 (239) | Dermatologist’s and non-expert’s | N = 4 | General physicians (n = 2) Dermatologists (n = 2) | Expert group: five or more years of clinical experience in dermoscopy Non-expert group: non-trained general physicians. | NA | NA | NA | Comparable performance |
| Marchetti MA 2018 (240) | Dermatologists | N = 8 | NA | The mean (range) number of years of postresidency clinical experience was 13 years (range, 3-31 years). The mean (range) number of years of the use of dermoscopy among readers was 13.5 years (range, 6-27 years).  All had a primary clinical focus on skin cancer. | NA | Y: blinded to diagnosis and clinical images/metadata | Multi (international) | Superiority of the ML |
|  | Marchetti MA 2020 (241) | Dermatologists  Dermatology residents | N = 17 | Dermatologists (n = 8) Dermatology residents (n = 9) | The mean (range) number of years of post-residency clinical experience and use of dermoscopy of the dermatologists was 14 (4-32) and 14.5 (7-28) years, respectively. | NA | Y: blinded to diagnosis, clinical images, and metadata | Multi (international) | Superiority of the ML |
| Haenssle HA 2018 (242) | Dermatologists | N = 58 | NA | Beginners: <2 years of experience (n = 17) Skilled: 2–5 years of experience (n = 11) Expert: > 5 years of experience (n = 30) (self-reported levels of experience with dermoscopy) | NA | NA | Multi (international) | Superiority of the ML |
|  | Haenssle HA 2020 (243) | Dermatologists | N = 96 | NA | Beginners: <2 years of experience (n = 17) Skilled: 2–5 years of experience (n = 29) Expert: > 5 years of experience (n = 40) (self-reported levels of experience with dermoscopy) | NA | Y: blinded of authors to true diagnoses | NA | Comparable performance |
| Haenssle 2021 (244) | Dermatologists | N = 64 | NA | Beginners: <2 years of experience (n = 9) Skilled: 2–5 years of experience (n = 20) Expert: > 5 years of experience (n = 30)  No information provided (n = 5) | NA | Y: blinding of authors to true diagnoses | NA | Superiority of the ML |
|  | Tschandl P 2019 (245) | Dermatologists Dermatology residents General practitioners | N = 511 | Board-certified dermatologists (n = 283) Dermatology residents (n = 118) General practitioners (n = 83) No information provided (n = 27) | <1 year experience (n = 80) >1 year experience (n = 99) >3 years experience (n = 194) >5 years experience (n = 111) Experts: >10 years experience (n = 27) | NA | NA | Multi (international) | Superiority of the ML |
| Maron RC 2019 (246) | Dermatologists | N = 112 | nie dotyczy | Resident physicians (n = 4) Chief physicians (n = 1) Senior physicians (n = 28) Attendings (n = 12)  Junior physicians (n = 67) | Y: The median years of dermatologic practice was 4 years,  47 (42.0%) dermatologists possessing less than 3 years of experience with dermoscopic examinations  37 (33.0%) between three and 10 years with dermoscopic examinations  and 28 (25.0%) with more than 10 years with dermoscopic examinations | NA | Multi (national) | Superiority of the ML |
|  | Tschandl P 2019 (247) | Dermatologists  Dermatology residents  Others | N = 95 | Dermatology Specialist (n = 62) Dermatology residents (n = 12) General practitioners (n = 17) Medical Student (n = 1) Nurse (n = 2) Oncologist (n = 2) | Beginner raters: <3 years (n = 31) Intermediate raters: 3-10 years (n = 28) Expert raters: >10 year (n = 36) | 51.6% female mean age, 43.4 years (95% CI, 41.0-45.7 years);  board-certified dermatologists. | NA | Multi (international) | Comparable performance |
| Fujisawa 2018 (248) | Dermatologists | N = 22 | Dermatologic trainees (n = 9) Board-certified (n = 13) | NA | NA | NA | NA | Superiority of the ML |
| Jinnai S 2020 (249) | Dermatologists | N = 20 | Dermatologic trainees (n = 10) Board-certified (n = 10) | NA | NA | NA | NA | Superiority of the ML |
| Han SS 2020 (250) | Dermatologists | N = 47 (Binary) N = 4 (Multiclass) | Board-certified (n = 21) Dermatology residents (n = 26) Dermatologists (n = 4) Board-certified (n = 2) Dermatology residents (n = 2) | NA | NA | Y: all clinical information | NA | Non-inferiority (Binary) Comparable performance (Multiclass) |
|  | Han SS 2018 (251) | Dermatologists board members | N = 16 | Clinicians (>10 years of experience) (n = 6) Professors (n = 10) | NA | NA | NA | NA | Non-inferiority |
| Brinker TJ 2019 (252) | Dermatologists | N = 145 | Junior clinicians (n = 88) Attendings (n = 16) Senior clinicians (n = 35) Chief clinicians (n = 3) | Y: Fig. 1, Fig. 2. | Y: University hospital (n = 142)  Resident physicians (n = 3) | NA | Multi (national) | Non-inferiority |
| Han SS 2020 (253) | Dermatologists | N = 44 | Attending clinicians (n = 65) Board-certified dermatologists (n = 44) | Y:  Dermatologists: 5.7 ± 5.2 (mean ± SD) years of experience after board certification Attending physicians: 7.1 ± 9.5 (mean ± SD) years of experiences after board certification at the time of biopsy request. | NA | NA | NA | Non-inferiority (Binary) Significant superiority of the ML (Multiclass) |
| Hekler A 2019 (254) | Pathologists | N = 11 | NA | Y:  Junior physicians: with less than 3 years of practical experience (n =3)  Board-certified pathologists: more than 4 years of practical experience (n = 8) | NA | NA | Multi (national) | Superiority of the ML |
| Brinker TJ 2022 (255) | Dermatopathologists | N = 18 | NA | Each dermatopathologistsat with at least 5 years of experience | NA | NA | Multi (international) | Non-inferiority |
| 5 | Henn J 2021 (74) | 2 out of 47 | Brennan M 2019 (256) | Physicians | N = 20 | Surgical intensivists - attending physicians (n = 14) Residents - trainees in anesthesiology and surgical fellowships (n = 6) | Y: with an average of 13 years of experience. | NA | Y: blinded to the observed outcomes of the cases. | Single (national) | Superiority of the ML |
| Kambakamba P 2020 (257) | Radiologists | N = 2 | NA | Y: experienced in cross-sectional image interpretation | NA | Y: blinded to the clinical and histopathologic information | NA | No results of direct comparison with experts |
| 6 | Hickman S 2021 (75) | 12 out of 14 | Yala A 2019 (258) | Radiologists (fellowship-trained or equivalent breast imaging radiologists) | N = 23 | NA | Y: 1–31 years of experience | NA | NA | Single (national) | Comparable performance |
| McKinney SM 2020 (259) | Radiologists | N = 57 | UK reader study (n = 51) USA reader study (n = 6) | Y: UK reader study: years of experience (12; 7; 4; 12; 15; 10), reads per year (2,000 - 5,500), Fellowship trained: Yes by 2 USA reader study: years of experience (4 x 5-10; 5 x 10-15; 4 x 15-20; 4 x20+ 5; 33 x unknown), reads per year (3,000 - 8,000+), Fellowship trained: 8 x Consultant Radiologist; 6 x Consultant Radiographer; 4 x Advanced Practitioner Radiographer; 33 x unknown). | Y: US-board-certified radiologists who were compliant with the requirements of the Mammography Quality Standards Act (MQSA) | Y: None of the readers who interpreted the images (either in the course of clinical practice or in the context of the reader study) had knowledge of any aspect of the AI system. | Double (UK) and Single (US) | Comparable performance |
|  | Balta C 2020 (260) | Radiologists | N = 6 | NA | NA | NA | NA | Double (national) | Comparable performance |
| Dembrower K 2020 (261) | Radiologists | N = 2 | NA | NA | NA | NA | Double (national) | Comparable performance |
| Kyono T 2019 (262) | Radiologists | N = 30 | NA | Y: at least 2 years of experience reading 5,000 mammograms or more per year | NA | NA | Single (national) | Comparable performance |
| Rodriguez-Ruiz A 2019 (263) | Radiologists | N = 101 | Wallis 2012 (n = 14) Visser 2012 (n = 6) Hupse 2013 (n = 9) Gennaro 2013 (n = 6) Siemens Medical Solutions 2015 (n = 22)  Siemens Medical Solutions 2015 (n = 31) Garayoa 2018 (n = 3) Rodriguez-Ruiz 2018 (n = 6) Clauser 2018 (n = 4) | Wallis 2012 (3–525; avg. – 10) Visser 2012 (1–34) Hupse 2013 (1–24; avg. – 14) Gennaro 2013 (5–30) Siemens Medical Solutions 2015 (>5)  Siemens Medical Solutions 2015 (>5) Garayoa 2018 (10–20) Rodriguez-Ruiz 2018 (3-44 (avg. - 22) Clauser 2018 (>5) | NA | NA | Multi (international) | Comparable performance |
|  | Geras K 2018 (264) | Radiologists | N = 4 | NA | experienced in reading breast cancer screening exams | NA | NA | Single (national) | Comparable performance |
|  | Lotter W 2019 (265) | Radiologists | N = 5 | NA | Y: practiced for an average of 5.6 years post-fellowship (range 2–12 years); the readers read an average of 6,969 mammograms over the year preceding the reader study (range of 2,921 – 9,260) | Y: Board-certified and MQSA-qualified, fellowship-trained in breast imaging | Y: blinded to the ground truth of the cases | Single (national) | Superiority of the ML |
|  | Rodriguez Ruiz A 2019 (266) | Radiologists | N = 14 | general radiologists (n = 3)  dedicated breast radiologists (n = 11) | Y: The median experience with MQSA qualification was 9.5 years (range, 3–25 years) mean number of mammograms read per year during the past 2 years was 5,900 (range, 1,200–10,000) | Y: Mammography Quality Standard Act–qualified radiologists | Y: blinded to any information about the patient, including previous radiology and histopathology reports. | Single (national) | Comparable performance |
| Schaffter T 2020 (267) | Radiologists | NA | single radiologist consensus radiologist | NA | NA | NA | Multi (international) | Inferiority |
| Salim M 2020 (268) | Radiologists | N = 45 | first-reader (n = 25) second-reader (n = 20) | NA | NA | NA | Double (national) | Comparable performance |
| Kim HE 2020 (269) | Radiologists | N = 14 | breast specialists (n = 7) general radiologists (n = 7) | NA | Y: Board-certified radiologists, general radiologists had not been specifically trained in breast imaging; breast specialists had been trained in breast imaging for at least 6 months | Y: observer-blinded study | Multi (national) | Superiority of the ML |
| 7 | Jones O 2020 (90) | 1 out of 16 | Cowley JB 2013 (270) | Specialists (primary care physicians, surgeons) | N = 4 | practicing primary care physicians (n = 2) post CCT Colorectal surgeons (n = 2) | NA | NA | NA | Single (national) | Superiority of the ML |
| 8 | Kassem M 2021 (94) | 1 out of 49 | Brinker TJ 2019 (238) | Dermatologists | N = 157 | NA | Junior physicians (n = 88) Attendings (n = 15) Senior physicians (n = 45) Chief physicians (n = 3) | Y: University hospital (n = 151)  Resident physicians (n = 6) | NA | Multi (national) | Superiority of the ML  (CNN outperformed 136 out of 157 dermatologists) |
| 9 | Kuntz S 2021 (108) | 6 out of 16 | Wei JW 2020 (271) | Gastrointestinal pathologists | N = 5 | NA | Y: 3 with gastrointestinal pathology fellowship training and 2 who gained gastrointestinal pathology expertise through years of gastrointestinal pathology service. | NA | NA | Single (national) | Superiority of the ML |
| Song Z 2020 (272) | Pathologists | N = 5 | NA | NA | NA | NA | Double (national) | Comparable performance |
| Bychkov D 2018 (273) | Pathologists | N = 3 | NA | NA | NA | Y: blinded to patient outcome and the tissue cores were chosen | NA | Superiority of the ML |
| Geessink O 2019 (274) | Pathologists | N = 2 | NA | Y: > 10 years of experience with TSR scoring | NA | NA | Double (national) | Comparable performance |
| Kather JN 2019 (275) | Pathologists | NA | NA | NA | NA | Y: blinded to all other clinicopathological variables, outcome data, or gene expression data | NA | No results of direct comparison with experts |
| Zhao K 2020 (276) | Pathologists | N = 2 | NA | NA | NA | Y: blinded to patient clinical information and outcome | Double (national) | Comparable performance |
| 10 | Nguyen A 2018 (151) | 4 out of 8 | Suh HB 2018 (277) | Neuroradiologists | N = 5 | Review of the images (n = 3) Draw the region of interest (ROIs) (n= 2) | Y: Review: 5, 5 and 6 years’ experience, respectively, in radiology ROIs: 5, 9 years’experience in radiology. | NA | Y: blinded to clinical information | Single (national) | Superiority of the ML |
| Kang D 2018 (278) | Neuroradiologist | N = 2 | External validation (n = 2) Tumor segmentation (n = 1) | Y:  external validation: 5 years and 20 years of experience tumor segmentation: 4 years of experience in neuro-oncological imaging | NA | NA | NA | Superiority of the ML |
| Alcaide-Leon 2017 (279) | Neuroradiologists | N = 3 | NA | Y: with 3, 2, and 4 years of experience in neuroradiology after residency | NA | Y: blinded to clinical information and pathology reports. | Multi (national) | Non-inferiority |
| Yamashita K 2008 (280) | Nauroradiologists Residents | N = 11 | Review of the images (n = 2) Observer test: neuroradiologists, residents (n= 9) | 13, 10, 8, 8, 6, 5, 3, 3, and 3 years of experience in radiology practice. The first 3 were attending neuroradiologists. | Y: The radiologists with 6 or more years of experience were board certified in Japan, and the other radiologists, including residents, had not yet received board certification. | NA | NA | Comparable performance |
| 11 | Ossai C 2021 (155) | 3 out of 26 | Rehm GB 2018 (281) | Intensive care unit physicians | N = 2 | NA | NA | NA | NA | Single (national) | Comparable performance |
| Bakkes TH 2020 (282) | Expert | N = 1 | NA | NA | NA | NA | Single (national) | Inferiority |
| Mulqueeny Q 2009 (283) | Expert | N = 1 | NA | NA | NA | Y: blinded to the clinical data of the patient and was not involved in their care | Single (national) | Comparable performance |
| 12 | Quaak M 2021 (163) | 1 out of 44 | Aghdam MA 2019 (284) | Expert (mixture of CNN experts) | N = 3 | NA | NA | NA | NA | NA | Comparable performance |
| 13 | Salem H 2021 (174) | 14 out of 138 | Petrucci K 1991 (285) | Nurse | N = 10 | Nurse experts (nurse practitioners, clinical specialists) (n = 4) Nurse evaluators (who were also experts) (n = 6) | NA | Y: 3 out of 4 nurse experts held masters degrees in nursing.  All of the evaluators held masters degrees in nursing and one held a doctoral degree. | Y: blinded to the purpose of the study | NA | Non-inferiority |
| Gorman R 1995 (286) | Nurse | N = 5 | Gerontological nurse experts (n = 4)  Nurse knowledgeable in expert systems (n = 1) | NA | NA | NA | NA | Superiority of the ML |
|  | Chang P 1999 (287) | Urology attending physicians  Urology residents | N = 9 | Urology attending physicians (n = 4) Urology residents (chief resident n = 1, second-year urology residents n = 2, first-year urology residents n=2) | NA | NA | NA | Single (national) | Superiority of the ML |
| Koutsojannis C 2004 (288) | Urology residents  Expert doctor | N = 4 | Urology residents (n = 3) Expert doctor (n = 1) | NA | Y: Expert doctor was the director of the “Andrology Lab” | NA | NA | Quite better performance than non-expert urologists Inferiority than clinical experts |
| Koutsojannis C 2009 (289) | Urology doctor for prostate cancer | N = 1 | NA | NA | NA | NA | Single (national) | Comparable performance |
| Altunay S 2009 (290) | Expert physician | N = 1 | NA | NA | NA | NA | Single (national) | Comparable performance |
| Koutsojannis C 2012 (291) | Expert doctor | N = 1 | NA | NA | NA | NA | Single (national) | Comparable performance |
| Hassanien A 2011 (292) | Expert (overlap measure) | N = 1 | NA | NA | NA | NA | Single (national) | No results of direct comparison with experts |
|  | Torshizi AD 2014 (293) | Expert doctor | N = 1 | NA | NA | NA | NA | Single (national) | Comparable performance |
| Xiao D 2016 (294) | Radiological expert | N = 1 | NA | NA | NA | NA | Single (national) | Comparable performance |
| Hurst RE 1997 (295) | Human expert | N = 1 | NA | NA | NA | NA | Single (national) | Inferiority |
| Hao AT 2013 (296) | Expert nurses | N = 6 | Expert nurses involved in Delphi method (n = 9) Expert nurses evaluate the usability of the systems (n = 6) | NA | NA | NA | Single (national) | Comparable performance |
| Lopes MH 2013 (297) | Expert nurses | N = 3 | NA | NA | NA | NA | NA | Comparable performance |
| Koutsojannis C 2008 (298) | Multiple experts | NA | NA | NA | NA | NA | NA | Comparable performance |
| 14 | Shillan D 2019 (184) | 2 out of 258 | primary studies not indicated | | | | | | | | |
| 15 | Shlobin N 2021 (186) | 1 out of 40 | Qiu W 2020 (299) | Expert | N = 2 | NA | NA | NA | NA | Single (national) | Comparable performance |
| 16 | Siddiqui S 2022 (187) | 1 out of 45 | Qianqian Ni 2020 (341) | Radiologist | N = 3 | cardiothoracic resident radiologists (n = 3) | Y: 6, 5, and 2 years of experiences in chest imaging interpretation | NA | Y: blinded to clinical data and previous imaging results | Multi | Comparable performance (expert as gold standard) |
| 17 | Smets J 2021 (188) | 12 out of 89 | Tomita N 2018 (300) | Radiologist | N = 1 | NA | Y: over 18 years of musculoskeletal (MSK) radiology experience | Y: Board-certified | Y: blinded to the original diagnoses reported in radiology reports and system’s results | Single (national) | Comparable performance |
| Murata K 2020 (301) | Orthopedic experts | N = 53 | orthopedic residents (n = 20) board certified orthopedic surgeons (n = 24) board certified spine surgeons (n = 9) | NA | NA | NA | Single (national) | Comparable performance |
| Cheng CT 2019 (302) | Experts | N = 21 | Primary physicians (n = 15) Radiologists (n = 2) Orthopedic surgeons (n = 4) | NA | NA | NA | Multi (national) | Comparable performance |
| Yu JS 2020 (303) | Radiologists | N = 6 | Musculoskeletal fellow (n = 1) Musculoskeletal radiologist (n = 2) Diagnostic radiology residents (n = 3) |  | NA | NA | NA | Comparable performance |
| Yamada Y 2020 (304) | Orthopedic surgeons | N = 4 | Orthopedic surgeons (n = 2)  Resident orthopedic surgeons (n = 2) | Y: 22, 14 years of experience 4, 3 years of experience | Y: Board-certified | Y: blinded to clinical information such as the age of the patient and the mechanism of injury | Single (national) | Superiority of the ML |
| Jimenez-Sanchez A 2020 (305) | Clinical experts | N = 3 | Trauma surgeon (n = 1) Radiologist (n = 1) Resident trauma surgeon (under the supervision of the radiologist) (n = 1) | Y: -, senior, 5 year resident | NA | NA | Single (national) | Comparable performance |
|  | Adams M 2019 (306) | Human experts | NA | Radiologists  Radiology residents | NA | Y: Board-certified | NA | NA | Comparable performance |
| Mawatari T 2020 (307) | Clinical experts | N = 7 | Radiologists (n = 3)  Orthopedist (n = 1) Radiology specialist trainee (n = 1) General physician (n = 1) Senior resident (n = 1) | Y: 9, 13, 24 years of experience respectively. 22 years of experience 4 years of experience 4 years of experience senior | NA | NA | NA | Superiority of the ML |
| Urakawa T 2019 (308) | Orthopedic surgeons | N = 5 | NA | NA | Y: 2 board-certified and 3 non-board-certified surgeons | NA | NA | Superiority of the ML |
| Chung SW 2018 (309) | Human experts | N = 58 | General physicians (n = 28) General orthopedists (n = 11) Orthopedists specialized in the shoulder (n =19) | NA | NA | NA | Multi (national) | Superiority of the ML |
| Olczak J 2017 (310) | Orthopedic surgeons | N = 2 | NA | Y: senior | NA | Y: blinded to the network’s and the other reviewer’s labels | NA | Comparable performance |
| Lindsey R 2018 (311) | Orthopedic surgeons | N = 18 |  | Y: senior, multiple orthopedic hand surgeons with many years of experience | NA | NA |  | Comparable performance |
| 18 | Volpe S 2021 (208) | 1 out of 48 | Qazi A 2011 (312) | Physician | N = 1 | NA | NA | NA | NA | Single (national) | Comparable performance |
| 19 | Zheng Y 2022 (224) | 1 out of 8 | Misra Hebert 2020 (313) | Practicing clinicians | NA | NA | NA | NA | NA | NA | Comparable performance |

**Table 5.** Reviews with missing data (MD) discussed.

| **N** | **ICD-10 chapter** | **Lead author & year** | | **Total of studies included** | **Is MD discussed?** | **How many studies provided methodological approach to MD** | **MD methods used** |
| --- | --- | --- | --- | --- | --- | --- | --- |
| 1 | X | Bracher-Smith M 2021 (31) | | 13 | Y: 46% | 7 out of 13 | 1. Complete-case analysis 2. Code missingness as category in predictor 3. Imputation after excluding high missingness 4. Imputation using genetics server/application, 5. Imputation in-sample from binomial distributiona |
| 2 | V | Dallora A 2017 (45) | | 37 | Y: 5% | 1 out of 37 | 1. Censoring data using Cox proportional hazard models (CPHM) |
| 3 | III | Falconer N 2021 (60) | | 8 | Y: 75% | 5 out of 8 | 1. Imputation by K-nearest neighbour, 2. Sample and hold interpolation, 3. Sample-and-hold and if not applicable mean imputation. |
| 4 | X | Frondelius T 2022 [54] | 20 | | Y:15% | 3 out of 20 | 1. Complete-case analysis (patients   with missing data were excluded) |
| 5 | XIII | Hinterwimmer F 2021 (76) | | 19 | Y: Missing necessary details in the included evidence to repeat the ML model were one of the methodological deficiencies. | NA | NA |
| 6 | I | Hoyos W 2021 (80) | | 64 | Y: According to the reviewed articles, none of the papers used models to manage uncertainty related to data quality. To solve this problem, following methods were used: several machine learning alternatives: Bayesian models and fuzzy approaches; approaches that use robust estimators to deal with the problem of missing values and outliers; generation complementary data to the existing ones. | NA | NA |
| 7 | XXI | Huang J 2021 (81) | | 35 | Y: Missing data were accounted for in 5 studies (14%) using imputation. | 5 out of 35 | 1. Imputation |
| 8 | XXI | Kareemi H 2020 (92) | | 23 | Y: Included studies often did not report on how they handled continuous variables, missing data, or complexities in the data such as patient censoring and competing risks. Patients with missing data were often excluded (i.e., “case–control analysis”), and a description of which patients had missing data was infrequently provided. | NA | NA |
| 9 | XXI | Kausch S 2021 (95) | | 14 | Y: (Two studies, examined robustness against missing data.) | NA | NA |
| 10 | N/A | Kennedy EE 2021 (98) | | 28 | Y: 54%; Missing data were not mentioned or handled optimally in the majority of studies. Only 4 studies imputed missing data (multiple imputation); 13 models used complete case analysis (11 studies). | 15 out of 28 | 1. Multiple imputation 2. Complete case analysis |
| 11 | II | Kozikowski M 2021 (105) | | 8 | Y (Corresponding authors of selected publications were contacted individually to complete missing values and verify data extracted in contingency tables) | NA | NA |
| 12 | VI | Kumar S 2021 (106) | | 64 | Y (Clinical databases which are collected for specific research purposes are often relatively well-structured, standardized, and clean, even though they may still have a few missing values and outlier while raw EHR (electronic health record) data sources often have data quality issues and require significant effort for data preprocessing and feature engineering. However, they are a rich source of historical clinical data containing patient-level elements which can be effectively leveraged using ML-based computational techniques for longitudinal analyses of their preclinical phase to identify prognostic clinical phenotypes.) | NA | NA |
| 13 | XXI | Lequertier V 2021 (113) | | 74 | Y (Reimputation method was utilized for missing variable in 18.9% of inlcuded studies.) | 14 out of 74 | 1. Carry over the last observation, 2. Observed mean as a replacement value, 3. Machine learning technique, 4. Regression estimate. |
| 14 | II | Li J 2021 (114) | | 31 | Y (31 studies conducted data preprocessing, among which 20 described missing value information and reported missing value processing strategies, including deleting directly, multiple imputation, and nearest neighbor algorithm.) | 20 out of 31 | 1. Deleting directly, 2. Multiple imputation, 3. Nearest neighbor algorithm. |
| 15 | XV | Mangold C 2021 (123) | | 11 | Y (Handling of missing values was reported in 81.8% of the articles; the handling of missing data was done by removal of incomplete cases or simple imputation of missing values.) | 9 out of 11 | 1. Removal of incomplete cases, 2. Imputed missing values by hybrid ANN-CBR (artificial neural network research framework) approach, 3. Removed patients missing >50% of the attributes, model uses a probabilistic algorithm to handle missing data, 4. Removed variables with >50% of missing data, replaced missing data with mean value, 5. Simple imputation of missing data, 6. Imputation by K-nearest neighbors, 7. Excluded infants with missing data, 8. Excluded cases with missing data. |
| 16 | VI | Mari 2022 (124) | | 44 | Y: Pain intensity 0 (0%), pain phenotype 1 (7%), treatment response 1 (14%), only 2 of the studies reported their justification for the sample size and only around half of the intensity and phenotyping studies reported the presence and handling of missing data. | 25 out of 44 | 1. Primary MD not indicated (ROB assessment for all studies) |
| 17 | XIX | Mawdslay E 2021 (126) | | 9 | Y: 89%, Handling of missing data: a. The outcome variable can be imputed, or otherwise if those with missing outcome data are excluded, bias will be minimized through exploration of whether data are missing at random (e.g., significance testing of differences in predictor variables between those with and without the outcome of interest). b. Predictor data: missing data should be imputed rather than excluded when appropriate quantities of complete data are available. | 6 out of 9 | 1. Imputation of missing predictor information, 2. Excluded cases with outcome data, 3. Excluded cases with missing predictor or outcome data. |
| 18 | XXI | Moglia A 2021 (135) | | 35 | Y: Three studies explained how missing data were treated: two used only complete data, while another applied imputation (a technique where missing data are computed as the mean of the remaining one). There might be some biases in the results of the reviewed studies as almost all (32 out of 35) did not report how missing data were handled. | 3 out of 35 | 1. Excluded cases with missing data (used only complete data) 2. Imputation missing values of any feature by its median value |
| 19 | XIX | Moura F 2021 (141) | | 46 | Y: Extensive research into the use of statistical methods and machine learning imputation has been made to safely identify how to estimate these missing values in data processing and, where appropriate, disregard these values. | NA | NA |
| 20 | XIX | Nadarajah R 2021 (146) | | 11 | Y: 96% of model results were at high risk of bias predominantly driven by high risk of bias in the analysis domain (88%). This resulted from exclusion of participants with missing data from analysis (72%) or not mentioning missing data (16%) | 8 out of 11 | 1. Excluded participants with missing data. |
| 21 | XXI | Naemi A 2021 (147) | | 15 | Y: 10 articles did not utilize proper techniques to impute missing values and excluded up to 32% of incomplete patients’ records in some studies. Different approaches, including replacing missing values with median, considering missing values as a special value and imputation using GP technique were applied to impute missing values. | 5 out of 15 | 1. Replacing missing values with median, 2. Considering missing values as a special value (discrete categories using K-means clustering), 3. Imputation using GP technique - Gaussian Process Regression (GPR). |
| 22 | X | Ortiz-Barrios M 2021 (154) | | 65 | Y: All the selected studies completely reported the data of interest. | NA | Primary MD not indicated (ROB assessment for all studies) |
| 23 | VI | Rowe T 2021 (170) | | 12 | Y: Mitigation methods include exclude samples with > threshold missing or imputation of missing data. | 8 out of 12 | 1. The formulation of a latent representation learning method, which used incomplete samples, 2. Imputation missing values by Expectation Maximization algorithm, 3. Imputation missing genotypes (according to the 1000 genome haplotypes; using MaCH software; or no method given), 4. Missing values replaced with median of nearest neighbors, 5. Excluded samples with >10% missing predictor values. |
| 24 | IX | Wang W 2020 (209) | | 18 | Y: 55% - Imputation or case analysis. | 10 out of 18 | 1. Single imputation, 2. Complete case analysis, 3. Cases discarded with missing outcomes, 4. Multiple imputation by chained equations. |

Abbreviations: N/A - not applicable as SLR refers to acute care discharge whatever the condition

**Table 6.** Types of machine learning in reviews depending on ICD chapters.

| **ICD-10 Chapter** | **No of SLRs** | **Types of ML** | | | | | | | | | | | | | | | |
| --- | --- | --- | --- | --- | --- | --- | --- | --- | --- | --- | --- | --- | --- | --- | --- | --- | --- |
| **RF/DT** | **SVM** | **DL** | **Regression** | **kNN** | **Bayes** | **NLP** | **Neural Networks** | **LDA/QDA/MDA** | **boosted-bagged** | **GAM** | **PLS** | **PCA** | **Cox** | **other** |
| I | 9 | 33 | 18 | 28 | 53 | 3 | 7 | 0 | 53 | 0 | 11 | 2 | 0 | 0 | 2 | 15 |
| II | 43 | 368 | 264 | 222 | 127 | 59 | 58 | 1 | 440 | 15 | 55 | 0 | 5 | 5 | 18 | 196 |
| III | 2 | 2 | 7 | 13 | 0 | 2 | 1 | 0 | 4 | 0 | 0 | 0 | 0 | 0 | 0 | 5 |
| IV | 7 | 69 | 53 | 2 | 25 | 20 | 26 | 8 | 58 | 4 | 21 | 0 | 1 | 0 | 3 | 112 |
| V | 12 | 44 | 115 | 10 | 41 | 21 | 26 | 0 | 216 | 13 | 1 | 0 | 0 | 3 | 0 | 86 |
| VI | 30 | 183 | 476 | 15 | 160 | 80 | 86 | 4 | 286 | 44 | 29 | 1 | 4 | 0 | 1 | 383 |
| VII | 3 | 8 | 7 | 6 | 7 | 1 | 2 | 0 | 8 | 7 | 1 | 0 | 0 | 0 | 0 | 1 |
| VIII | 1 | 1 | 6 | 0 | 0 | 3 | 2 | 0 | 4 | 3 | 2 | 0 | 0 | 0 | 0 | 4 |
| IX | 19 | 165 | 117 | 53 | 79 | 41 | 46 | 4 | 253 | 3 | 51 | 1 | 1 | 2 | 1 | 160 |
| X | 20 | 107 | 89 | 159 | 104 | 21 | 34 | 5 | 182 | 4 | 58 | 0 | 4 | 3 | 4 | 153 |
| XI | 10 | 21 | 46 | 24 | 25 | 7 | 3 | 1 | 84 | 5 | 9 | 0 | 0 | 1 | 0 | 69 |
| XII | 4 | 42 | 0 | 64 | 76 | 0 | 31 | 10 | 126 | 0 | 1 | 0 | 0 | 35 | 0 | 227 |
| XIII | 15 | 141 | 117 | 37 | 79 | 25 | 47 | 9 | 248 | 3 | 58 | 0 | 1 | 0 | 0 | 88 |
| XIV | 5 | 46 | 28 | 4 | 30 | 10 | 10 | 2 | 198 | 3 | 20 | 0 | 0 | 0 | 0 | 71 |
| XV | 6 | 51 | 32 | 0 | 48 | 13 | 12 | 0 | 22 | 3 | 9 | 0 | 0 | 0 | 0 | 46 |
| XVI | 0 | 0 | 0 | 0 | 0 | 0 | 0 | 0 | 0 | 0 | 0 | 0 | 0 | 0 | 0 | 0 |
| XVII | 0 | 0 | 0 | 0 | 0 | 0 | 0 | 0 | 0 | 0 | 0 | 0 | 0 | 0 | 0 | 0 |
| XVIII | 2 | 17 | 17 | 13 | 12 | 2 | 10 | 0 | 0 | 1 | 4 | 0 | 0 | 1 | 1 | 18 |
| XIX | 7 | 31 | 57 | 3 | 8 | 9 | 12 | 0 | 45 | 9 | 2 | 0 | 0 | 1 | 0 | 29 |
| XX | 0 | 0 | 0 | 0 | 0 | 0 | 0 | 0 | 0 | 0 | 0 | 0 | 0 | 0 | 0 | 0 |
| XXI | 19 | 193 | 129 | 42 | 107 | 14 | 46 | 29 | 227 | 2 | 50 | 0 | 1 | 3 | 5 | 95 |
| XXII | 0 | 0 | 0 | 0 | 0 | 0 | 0 | 0 | 0 | 0 | 0 | 0 | 0 | 0 | 0 | 0 |
| **Total** | **214** | **1,522** | **1,578** | **695** | **981** | **331** | **459** | **73** | **2,454** | **119** | **382** | **4** | **17** | **54** | **35** | **1,758** | |
